# Supplementary material for: A Sn atom-economical approach toward arylstannanes: Ni-catalysed stannylation of aryl halides using Bu3SnOMe
Source: Royal Society of Chemistry journal article supplement (doi:10.1039/c5ob01096a), 2015-01-01

2a\_1H NMR (CDCl<sub>3</sub>, 399.83 MHz)

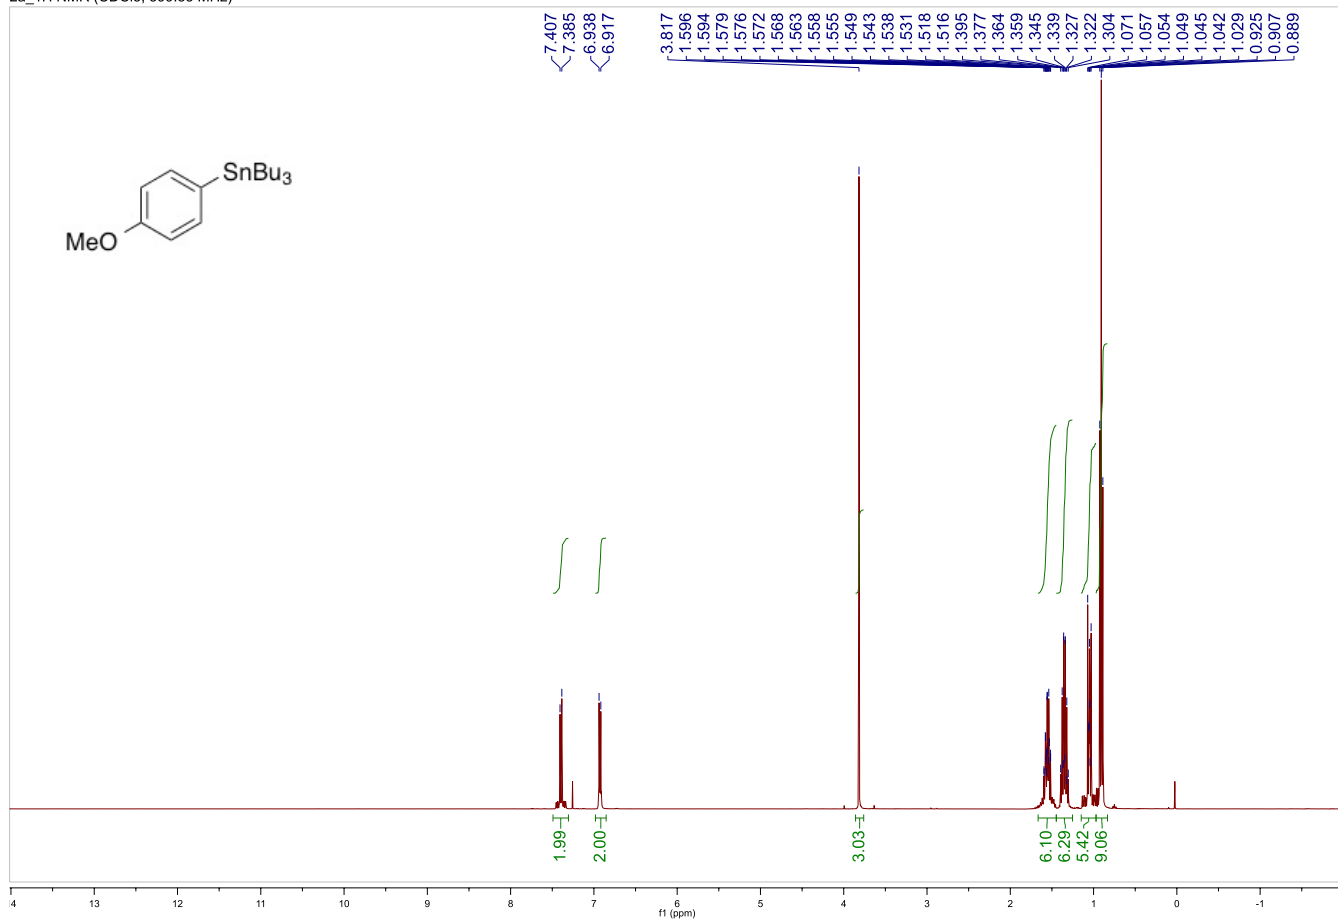

2a\_13C NMR (CDCl<sub>3</sub>, 100.55 MHz)

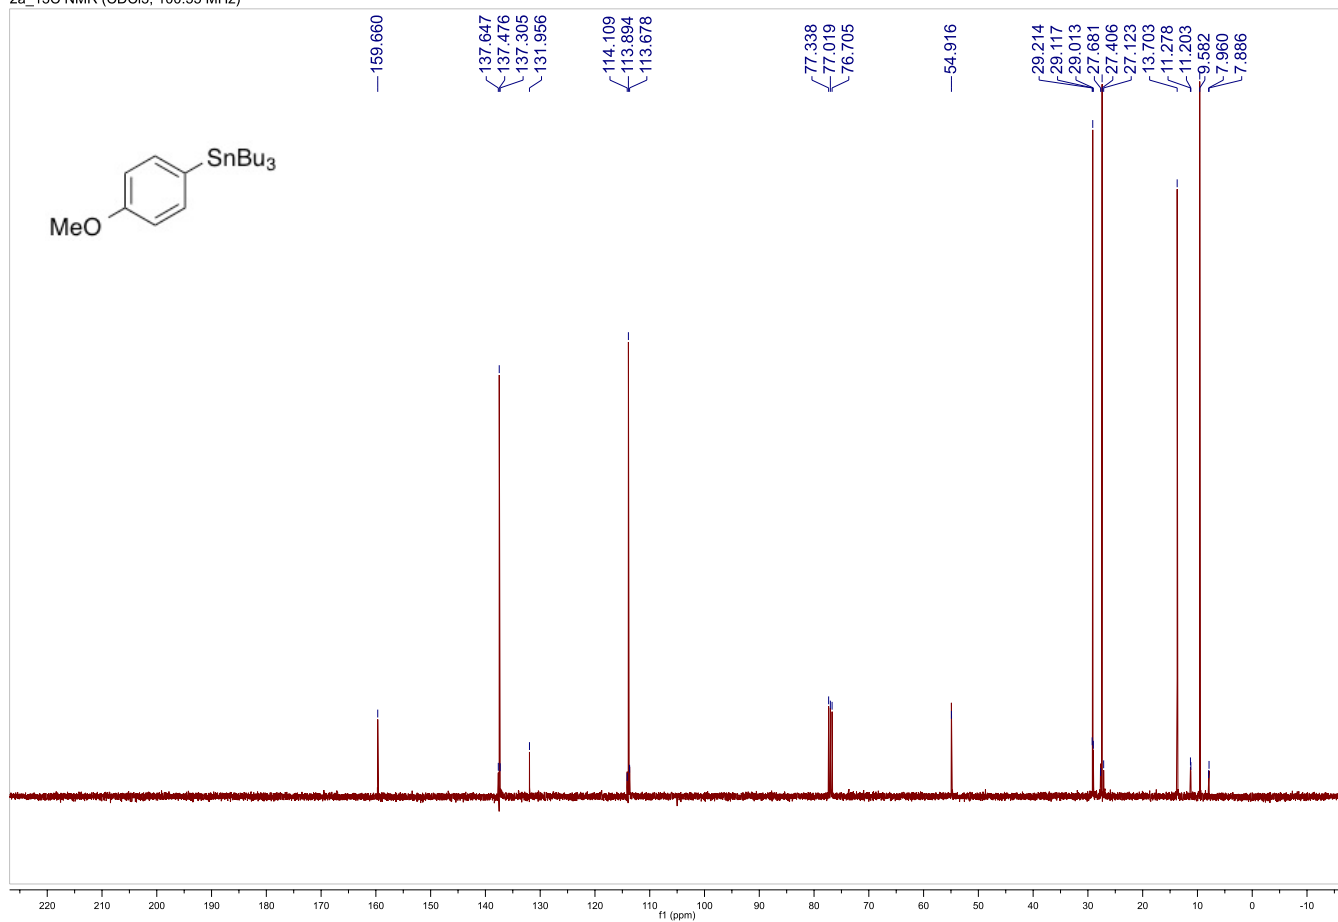

2b\_1H NMR (CDCl3, 499.94 MHz)

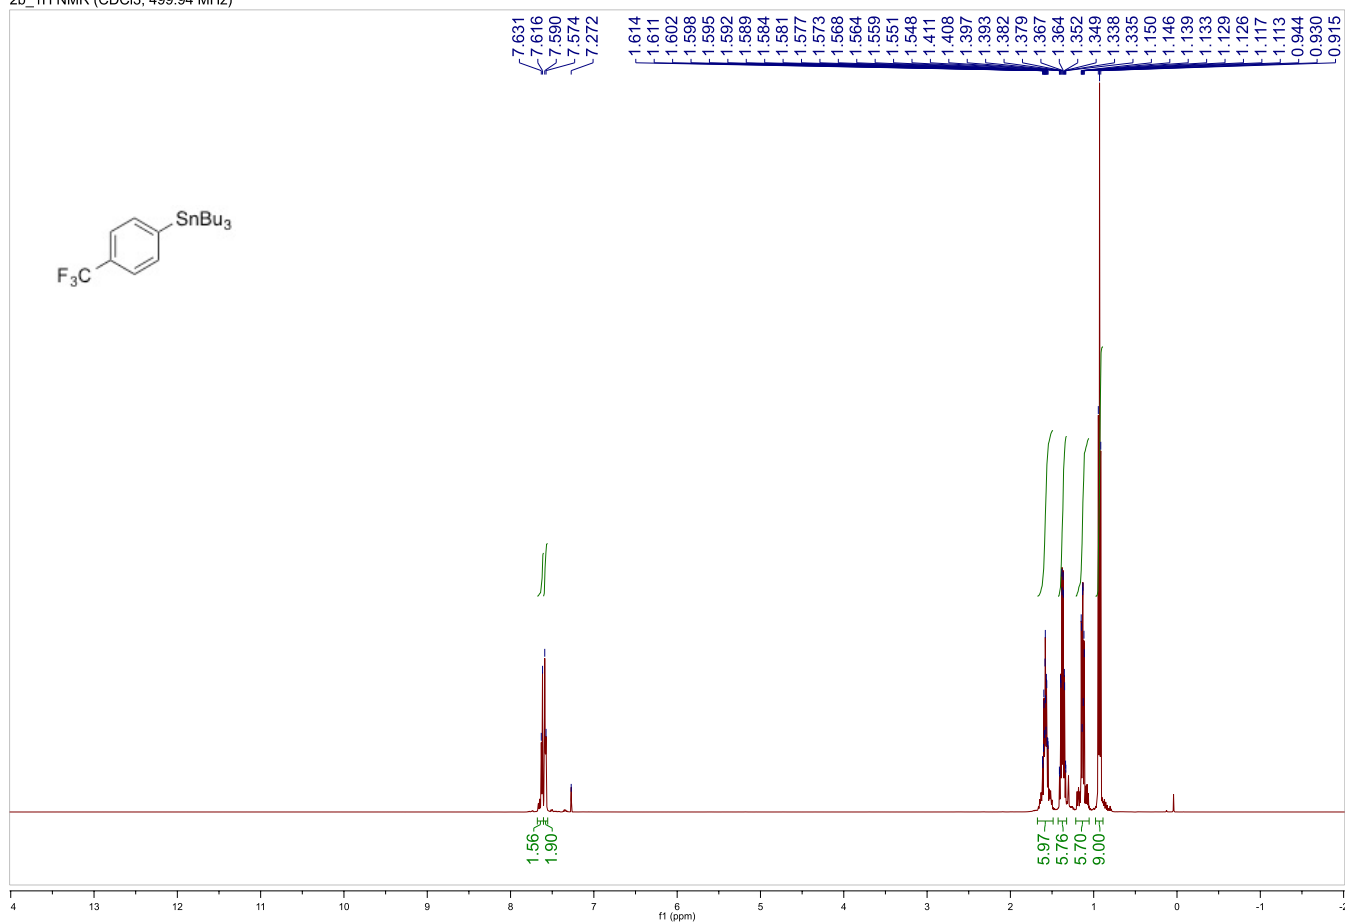

2b\_13C NMR (CDCl3, 125.72 MHz)

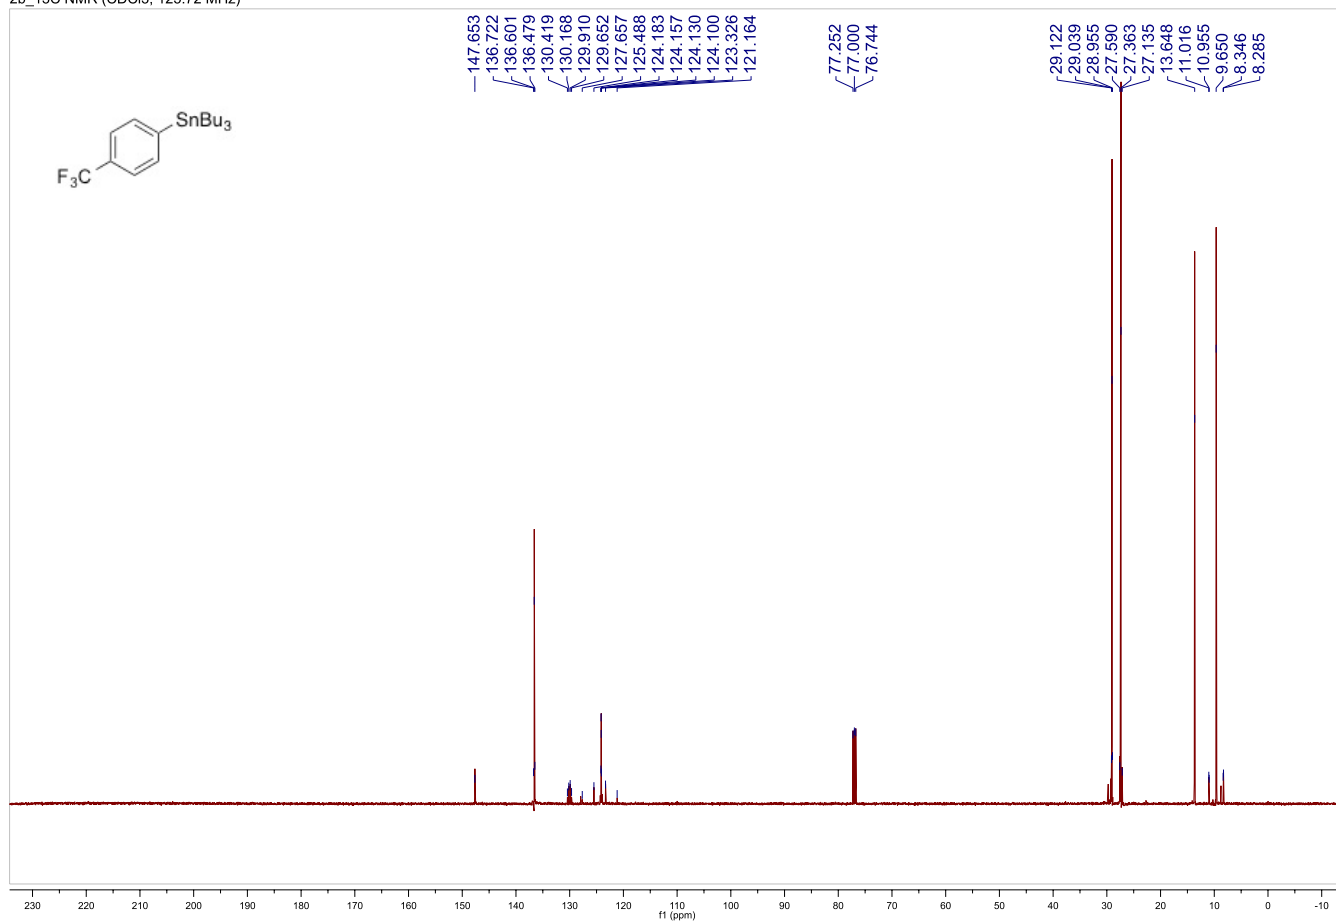

2c\_ 1H NMR (CDCl3, 399.83 MHz)

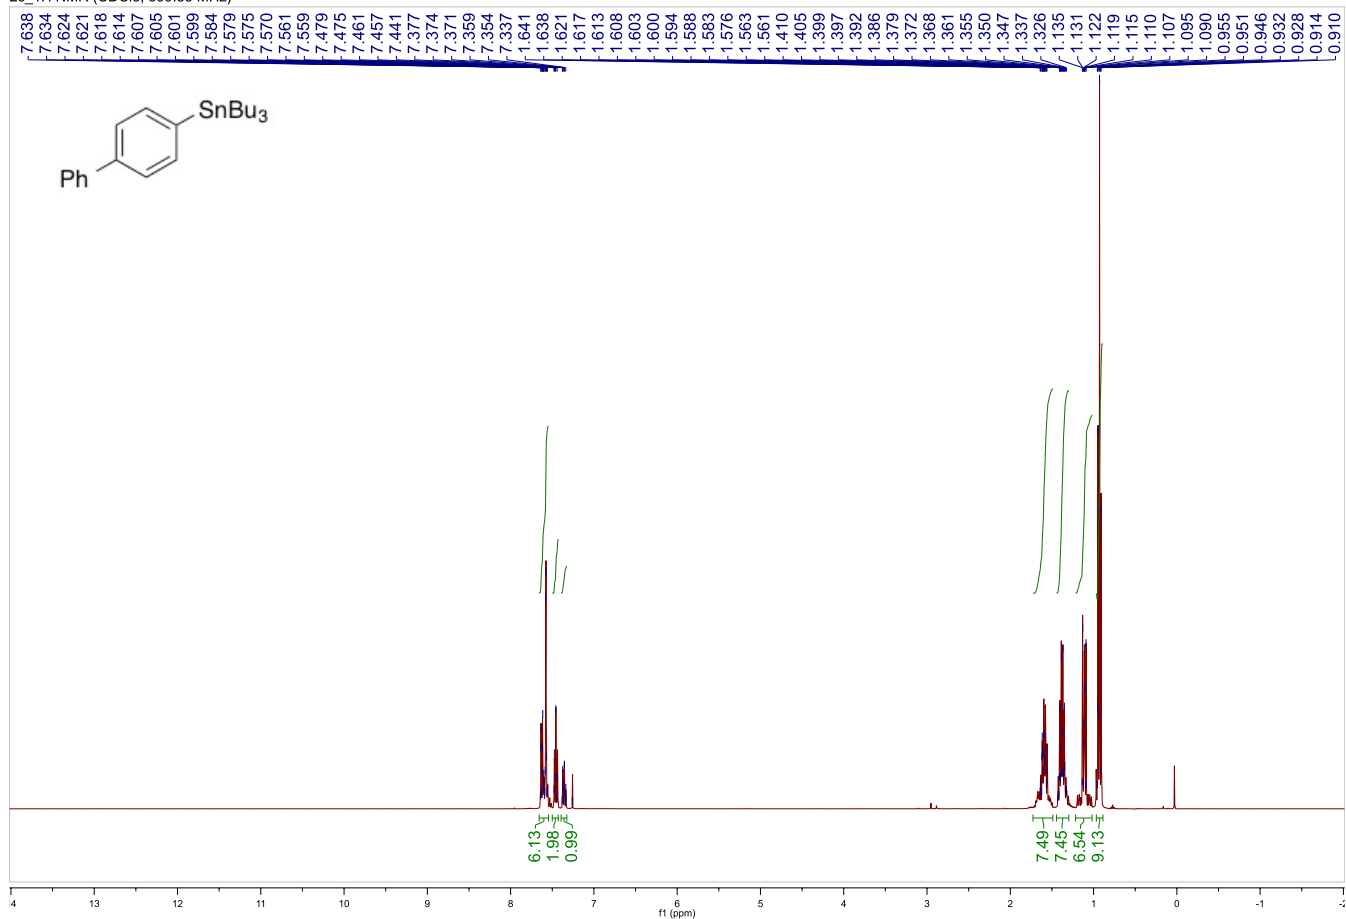

2c\_ 13C NMR (CDCl3, 100.55 MHz)

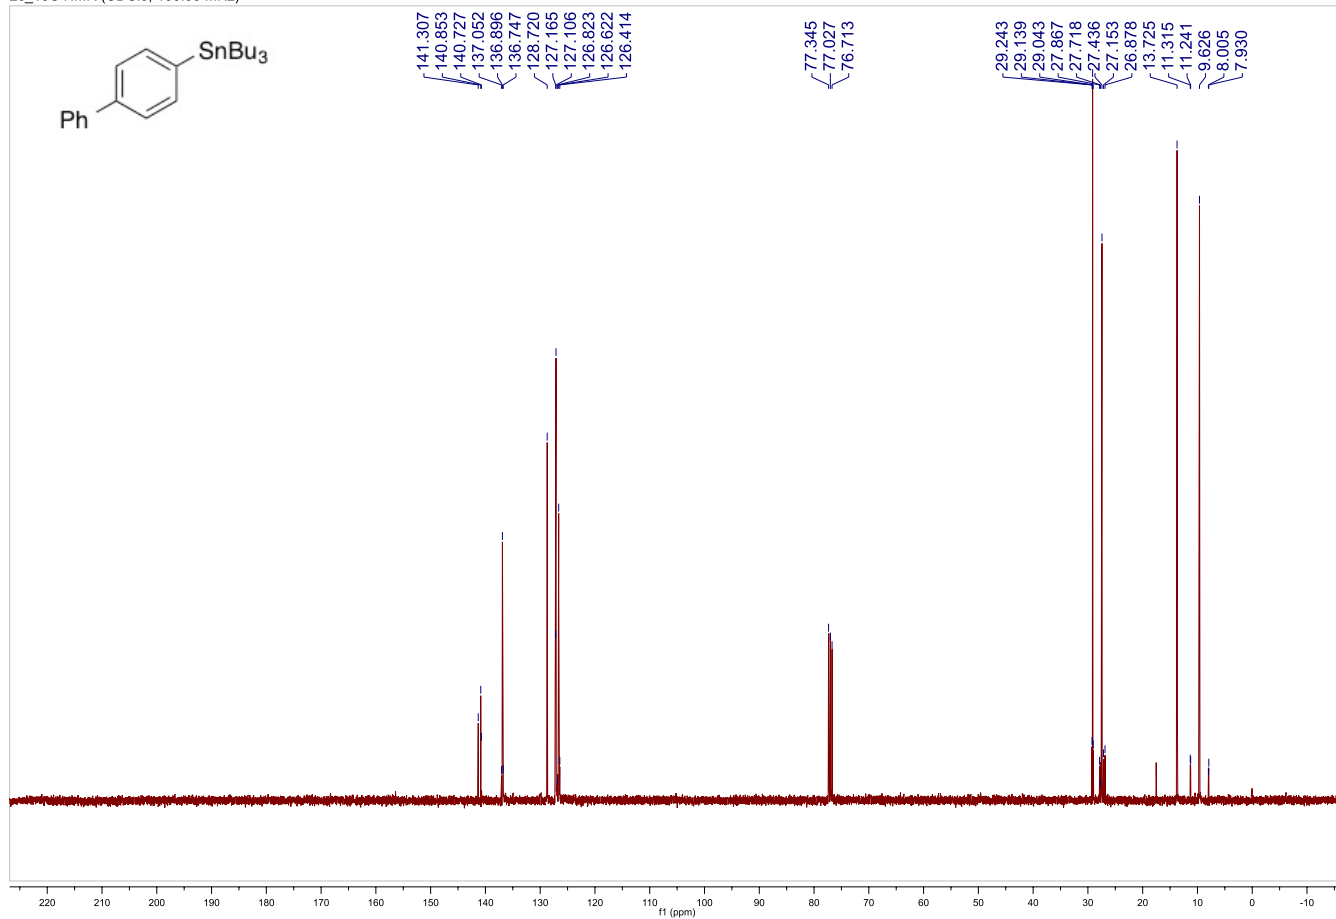

2d\_1H NMR (CDCl3, 399.83 MHz)

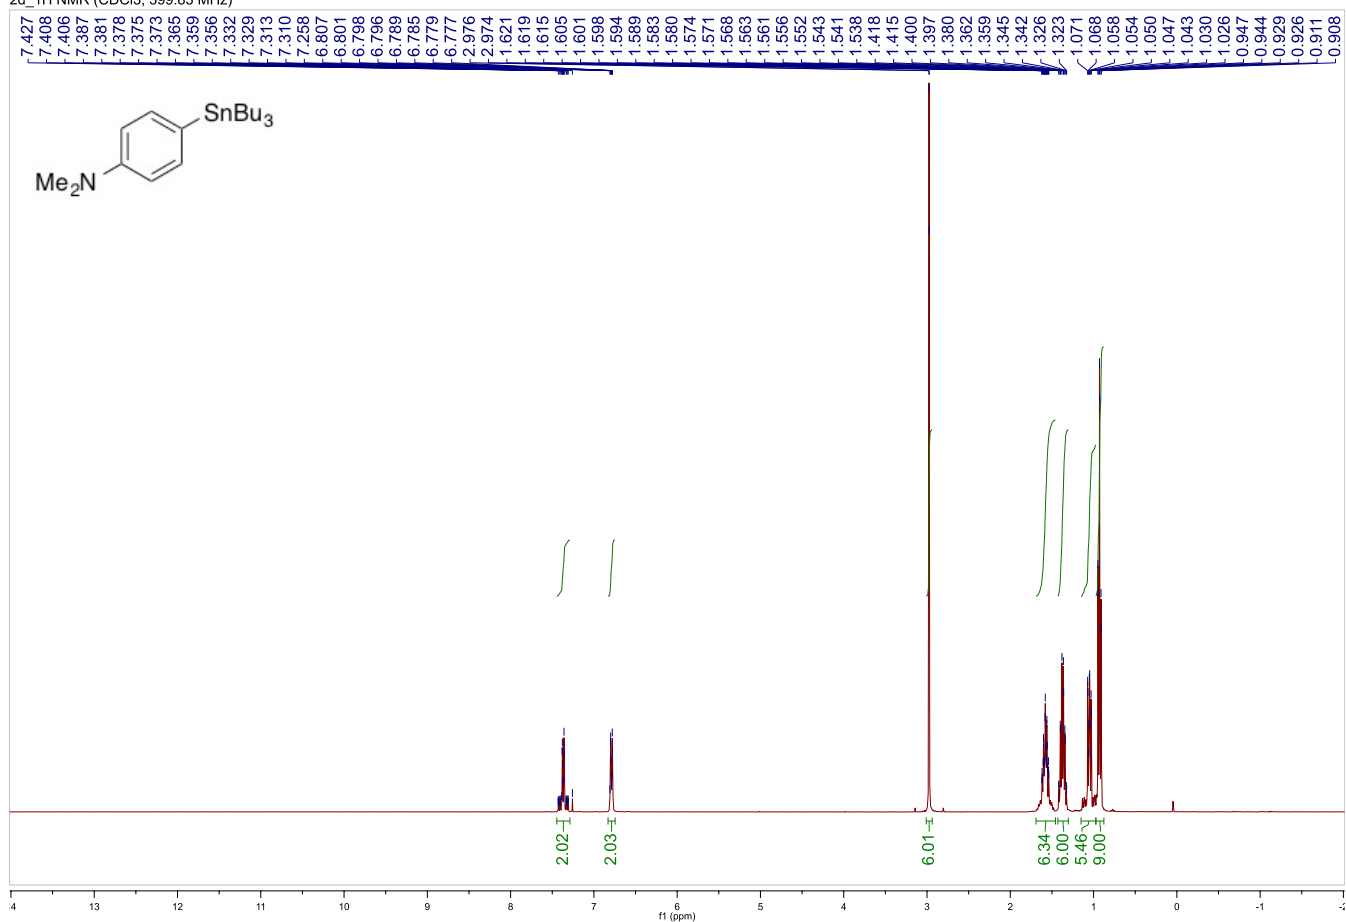

2d\_13C NMR (CDCl3, 100.55 MHz)

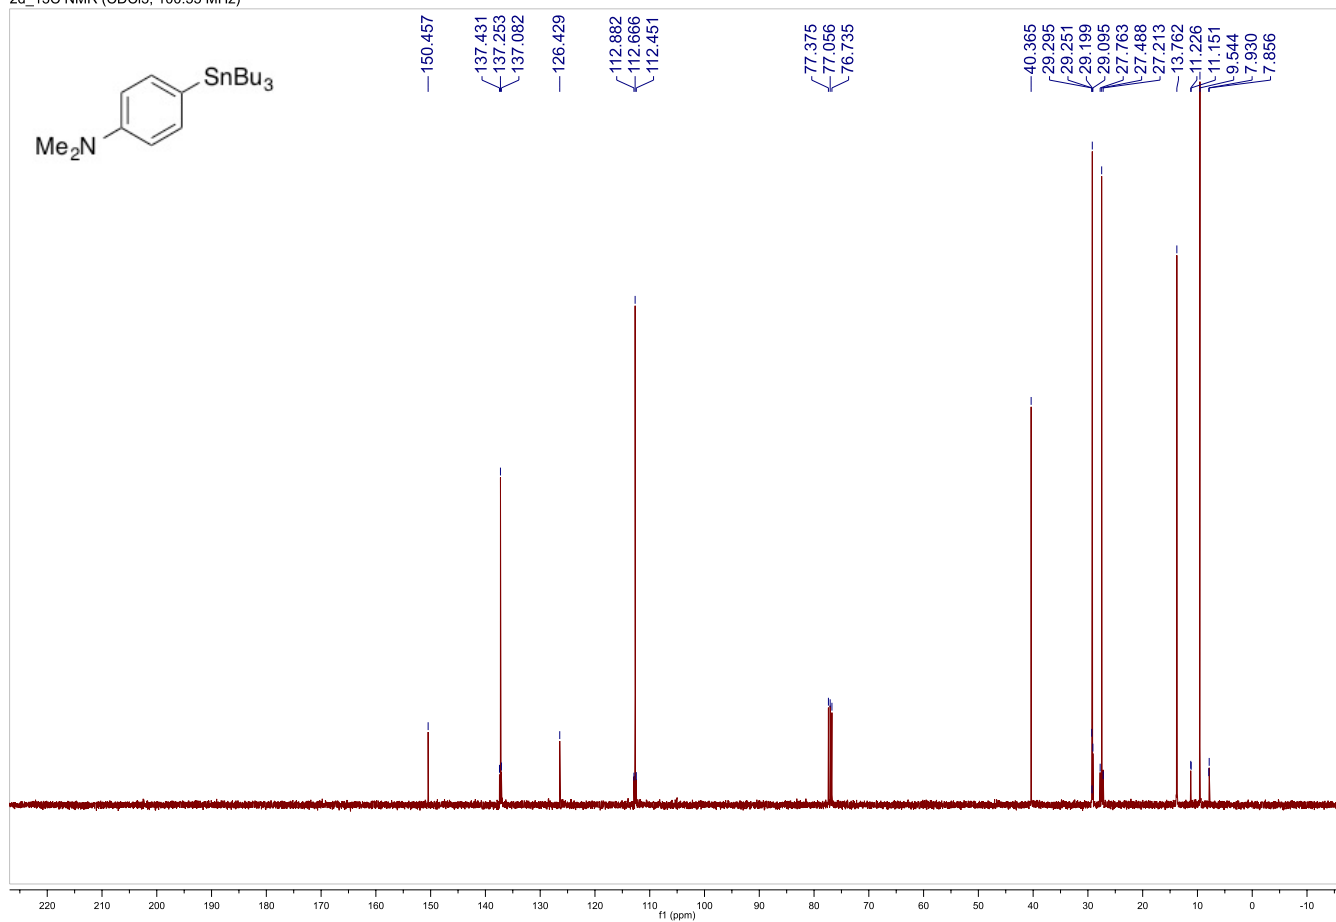

2e\_1H NMR (CDCl3, 399.83 MHz)

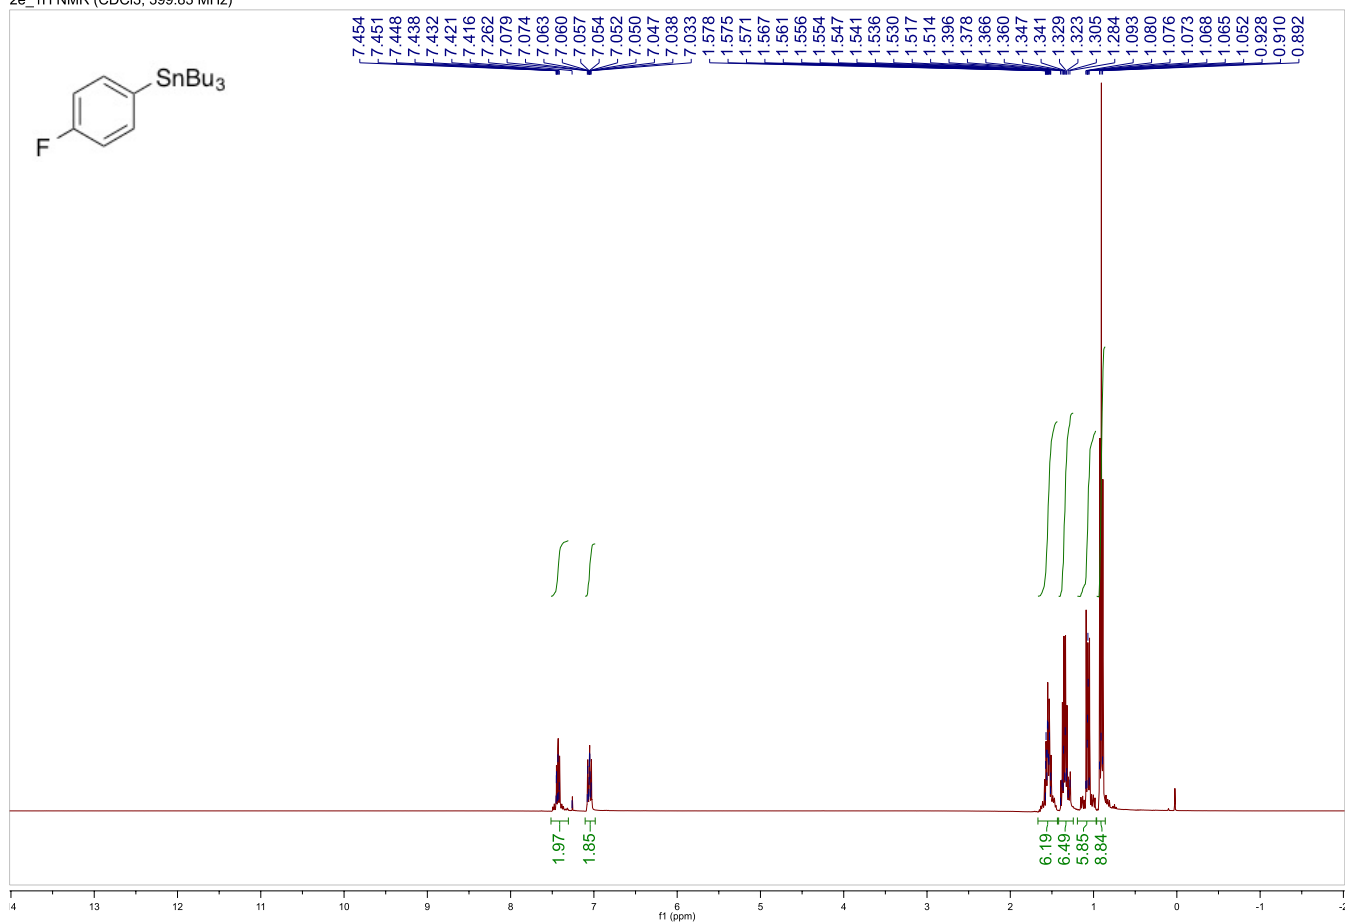

2e\_13C NMR (CDCl3, 100.55 MHz)

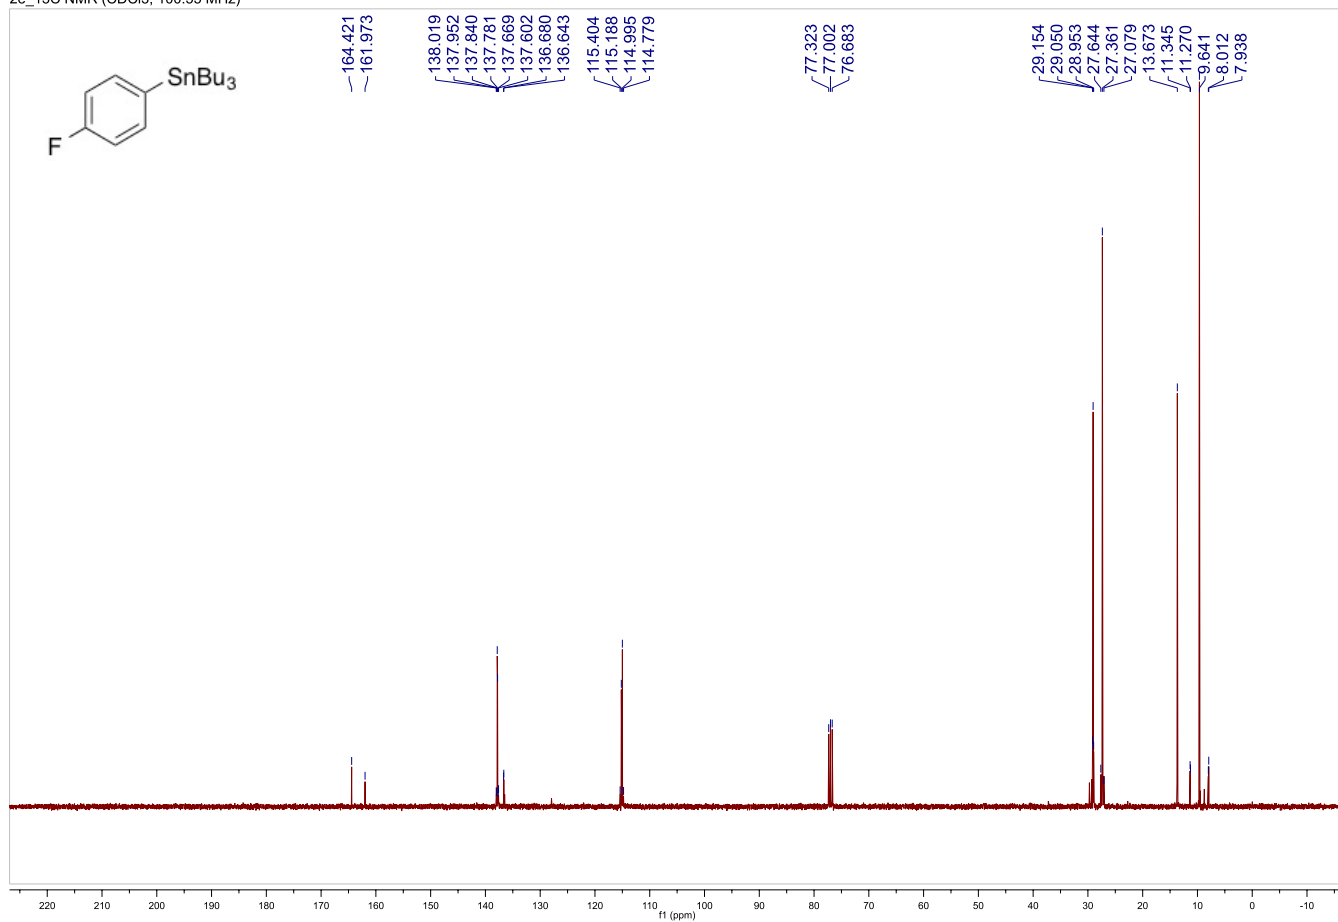

2f\_1H NMR (CDCl<sub>3</sub>, 399.83 MHz)

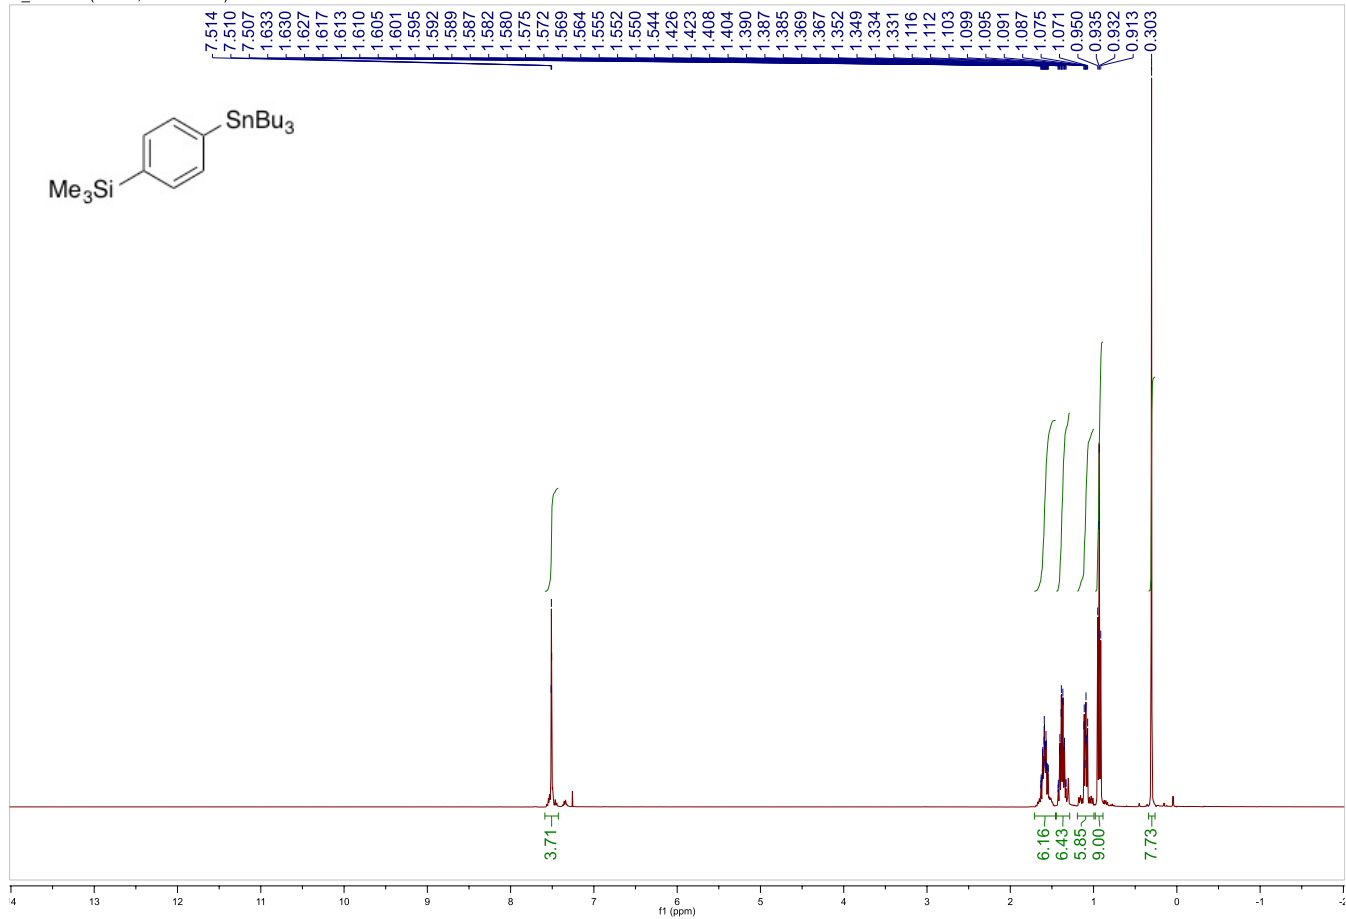

2f\_13C NMR (CDCl3, 100.55 MHz)

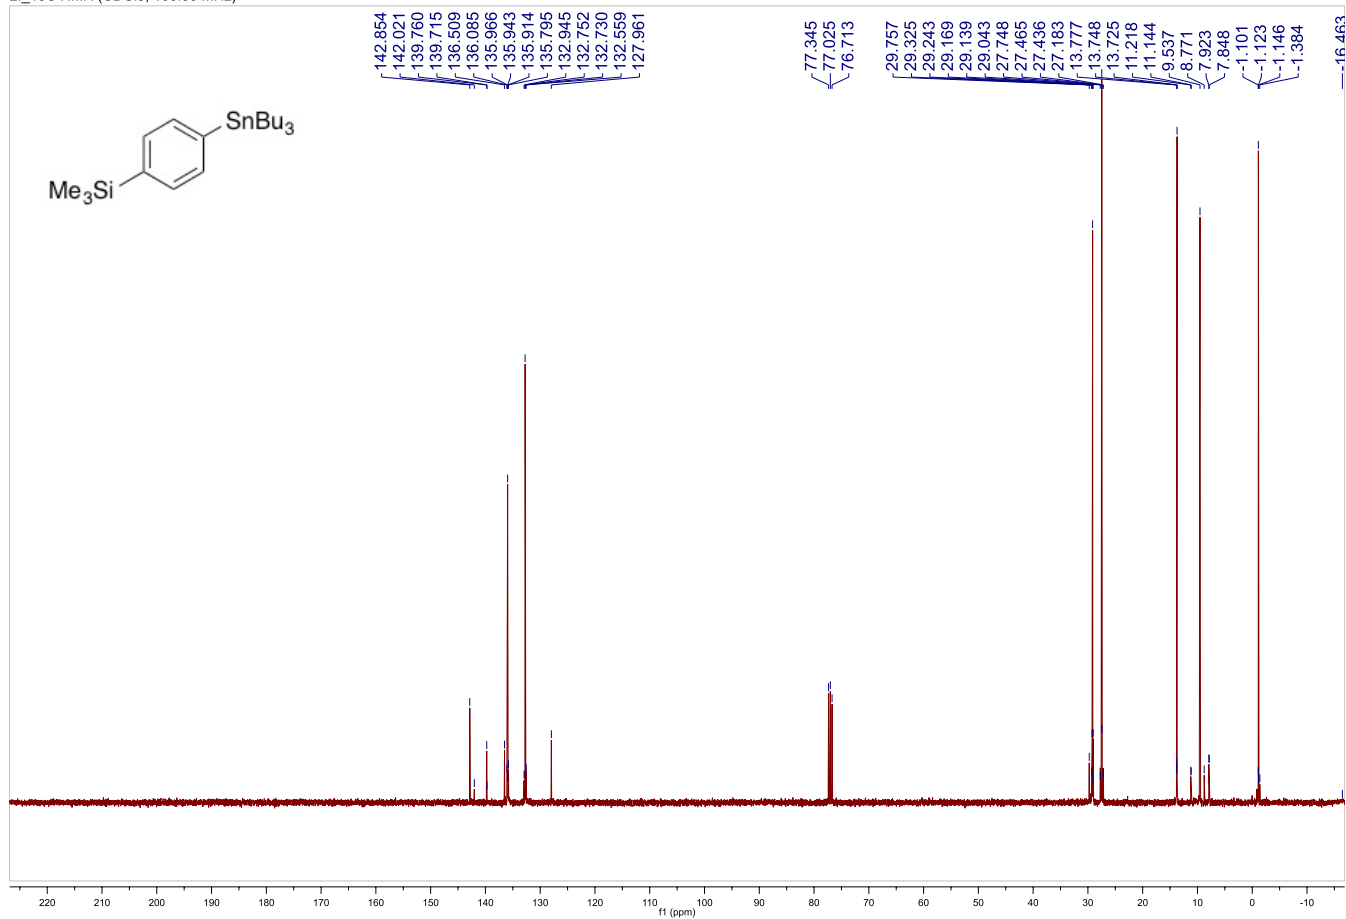

2g\_1H NMR (CDCl<sub>3</sub>, 399.83 MHz)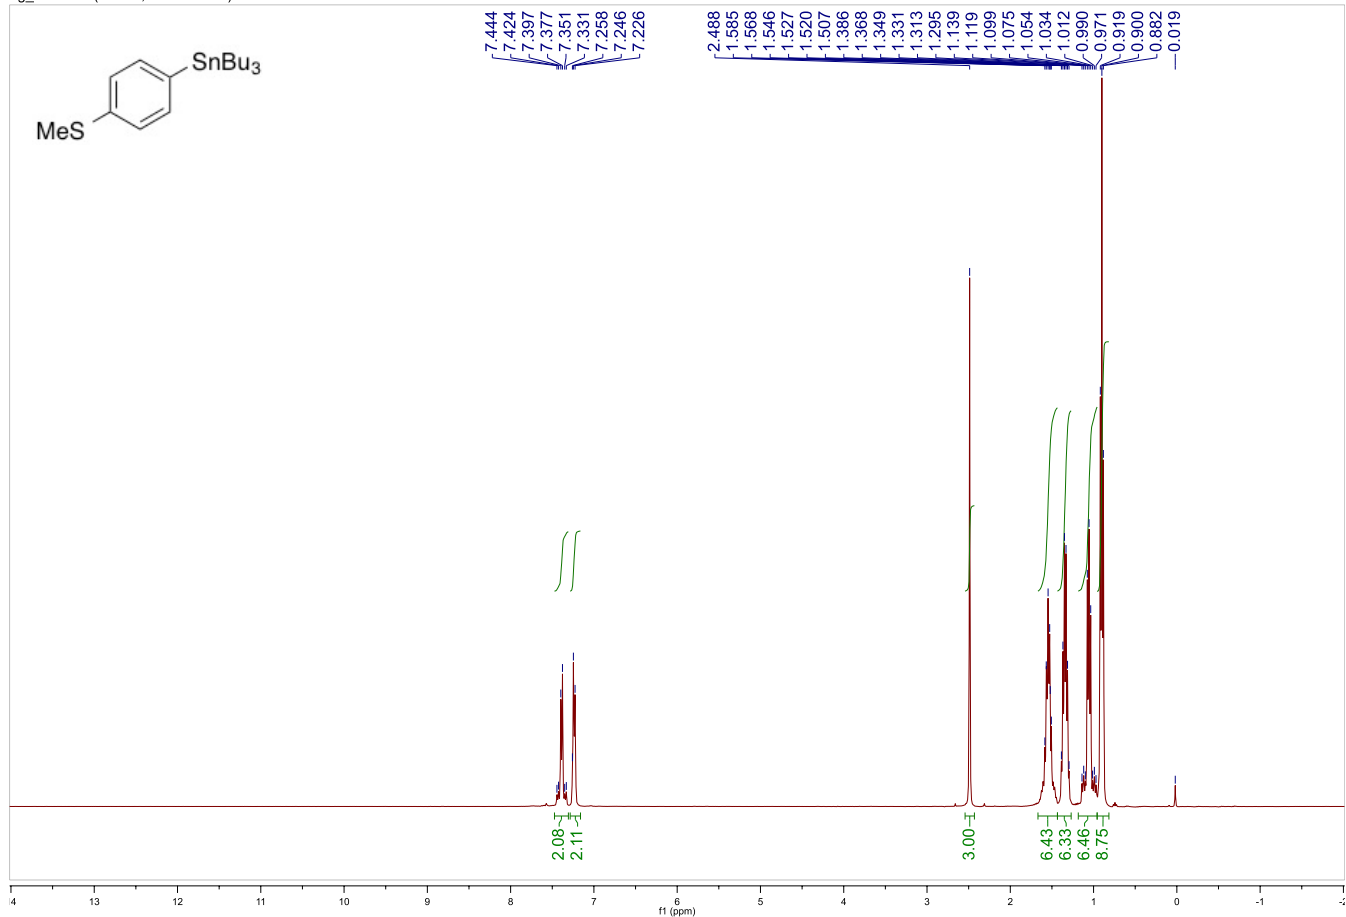2g\_13C NMR (CDCl<sub>3</sub>, 100.55 MHz)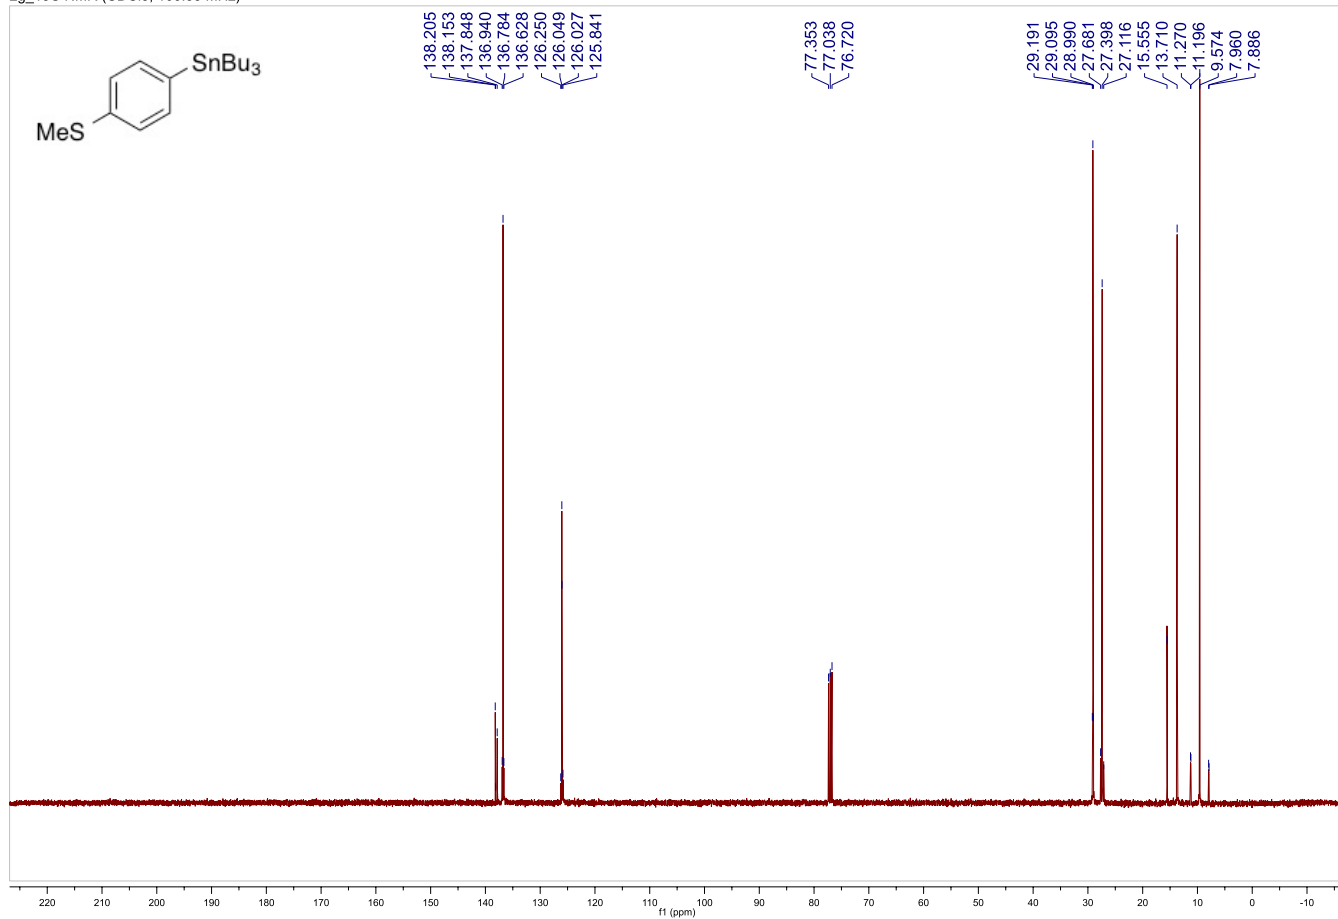

2h\_1H NMR (CDCl3, 399.83 MHz)

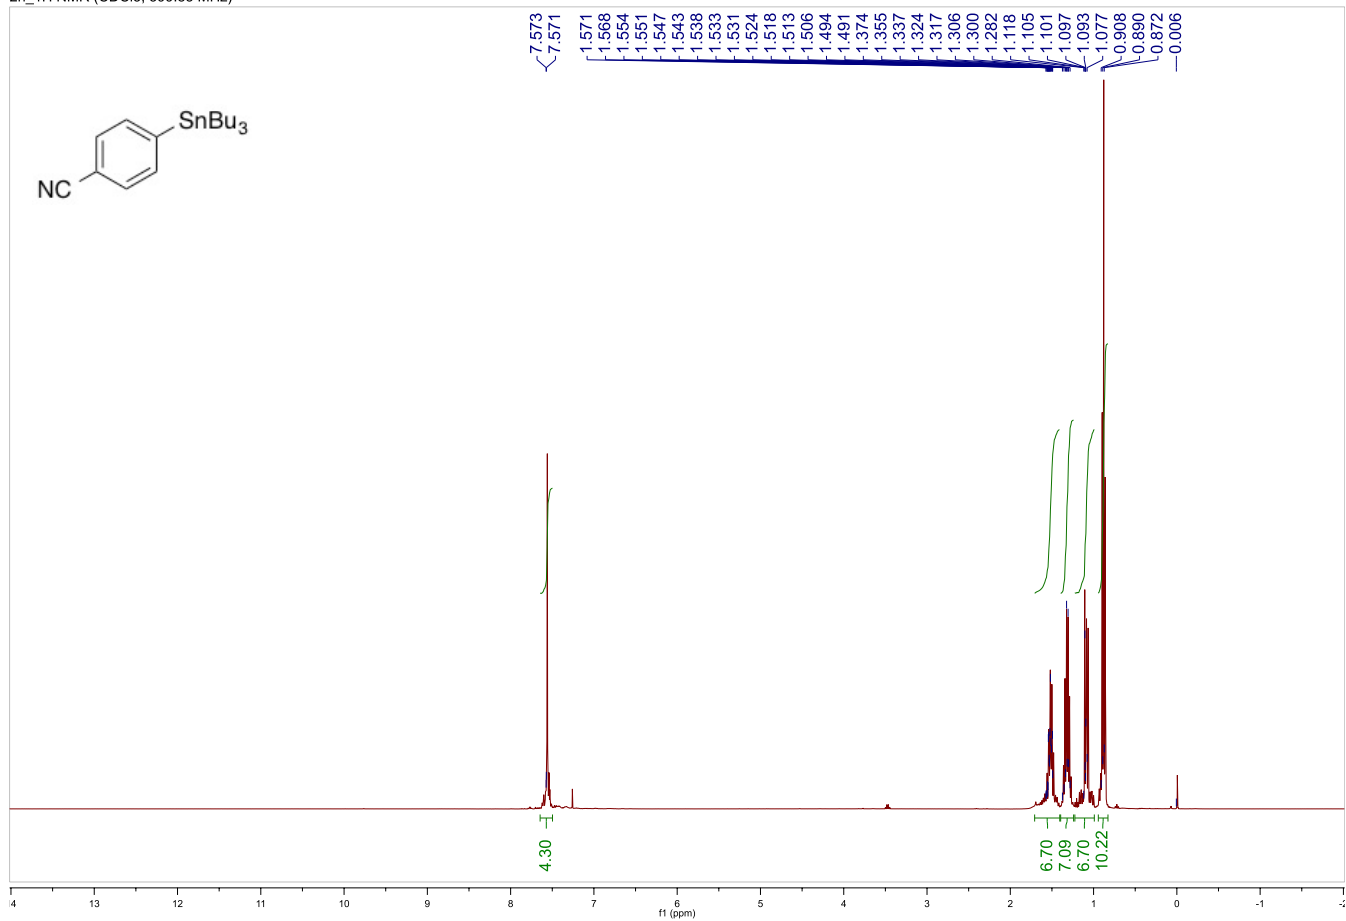

2h\_13C NMR (CDCl3, 100.55 MHz)

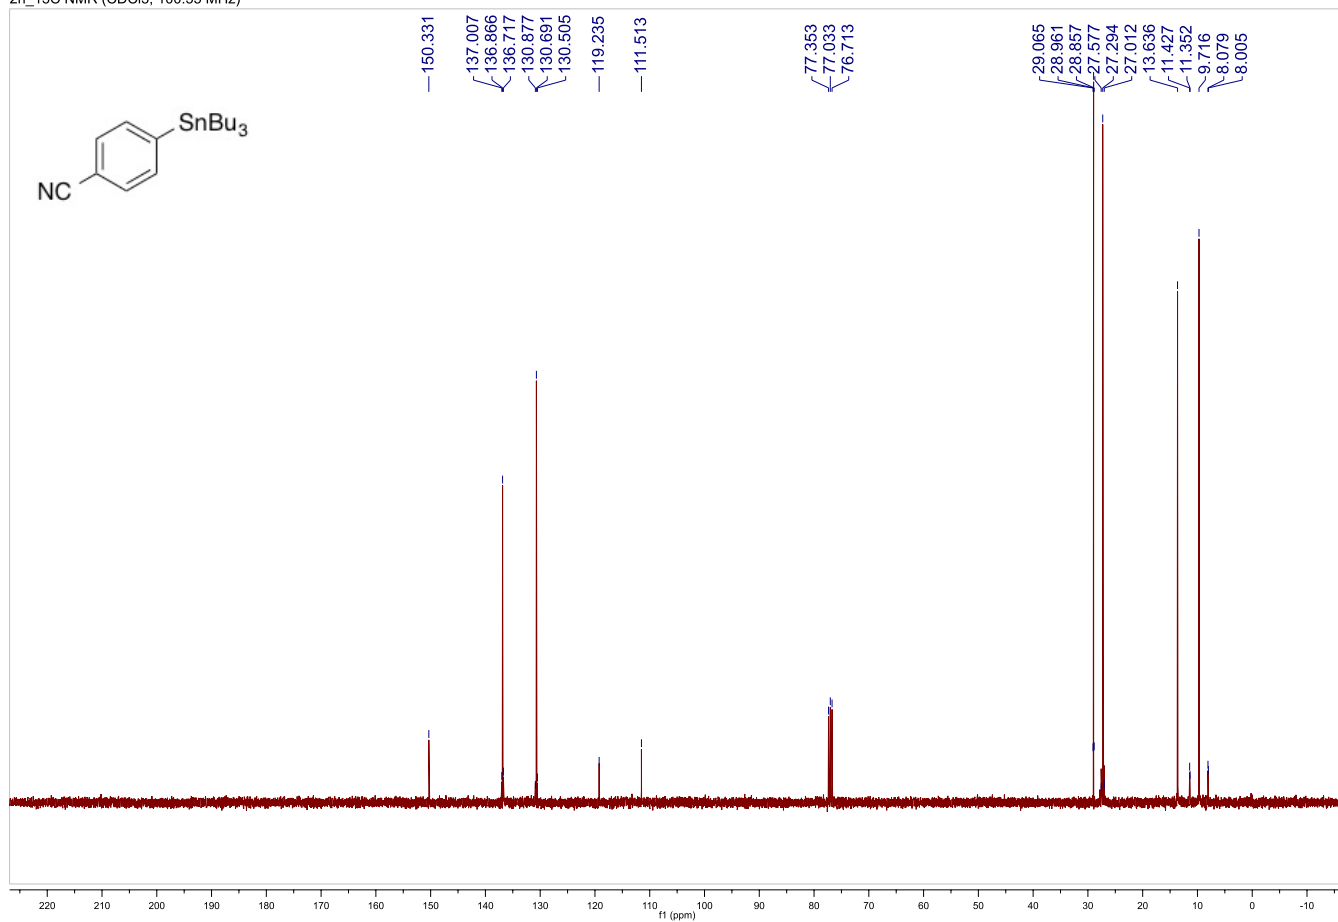



2i\_1H NMR (CDCl3, 399.83 MHz)

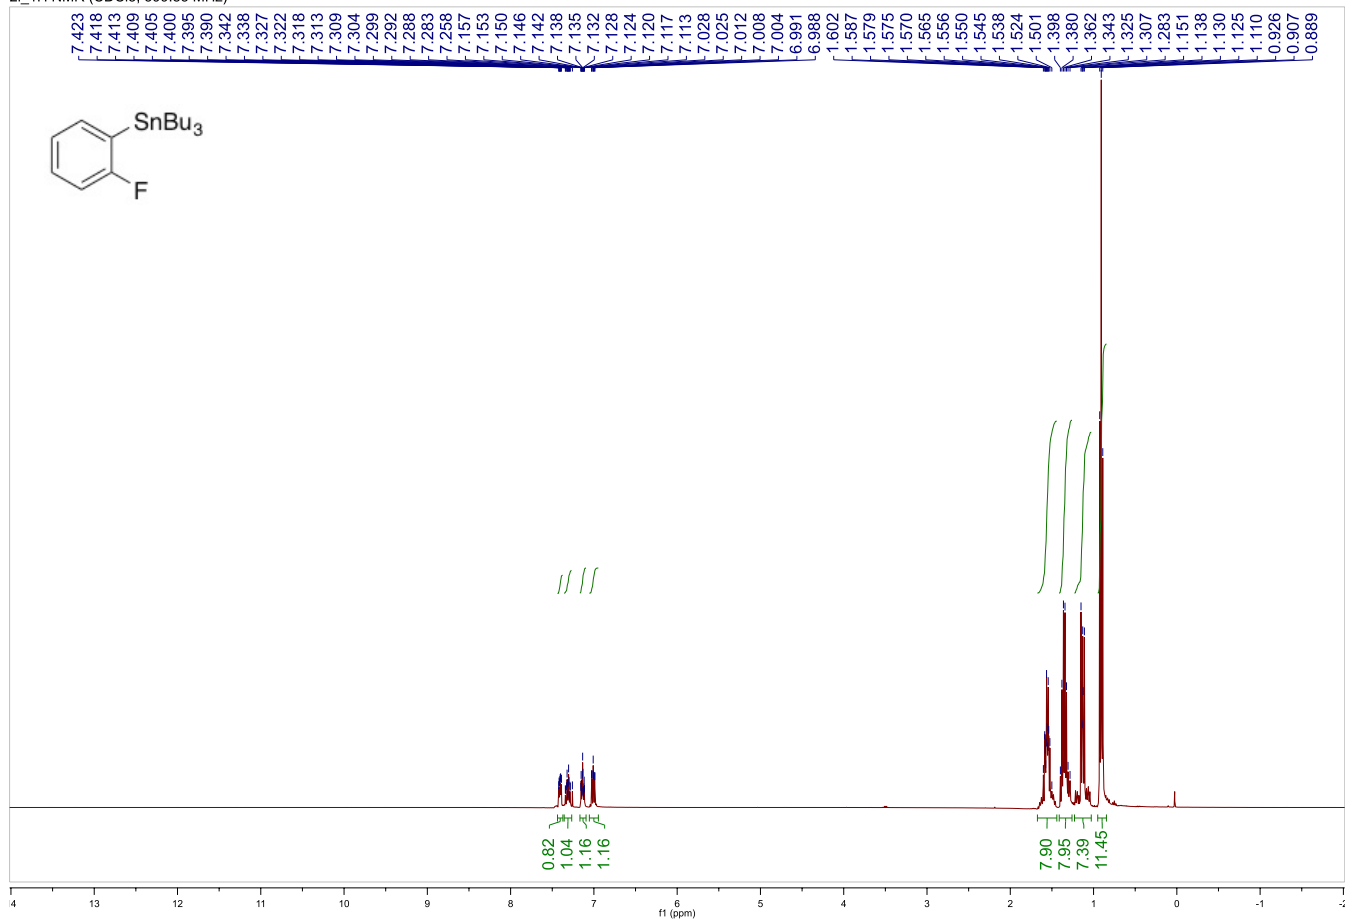

2i\_13C NMR (CDCl3, 100.55 MHz)

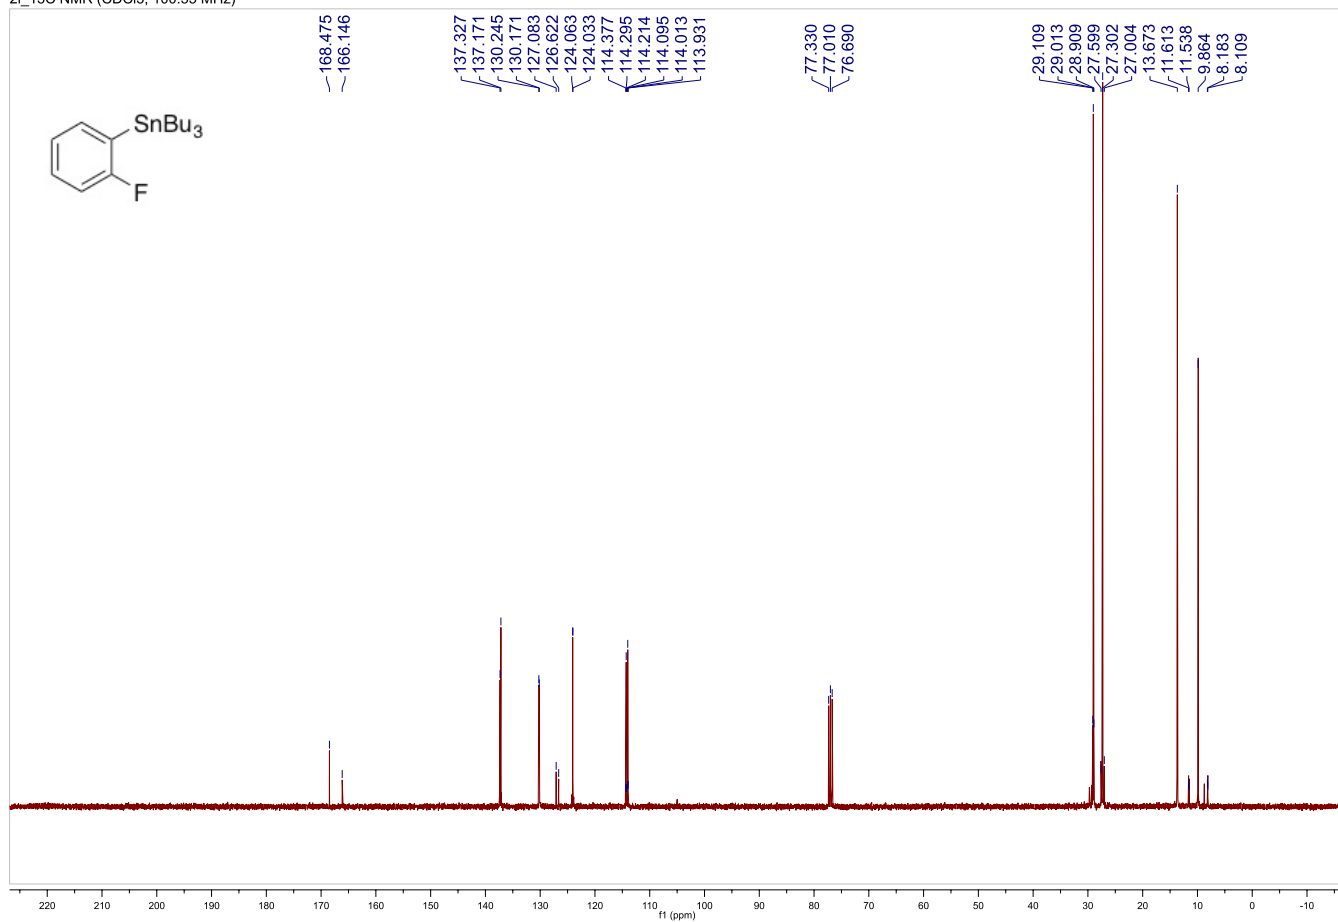

2j\_1H NMR (CDCl<sub>3</sub>, 499.94 MHz)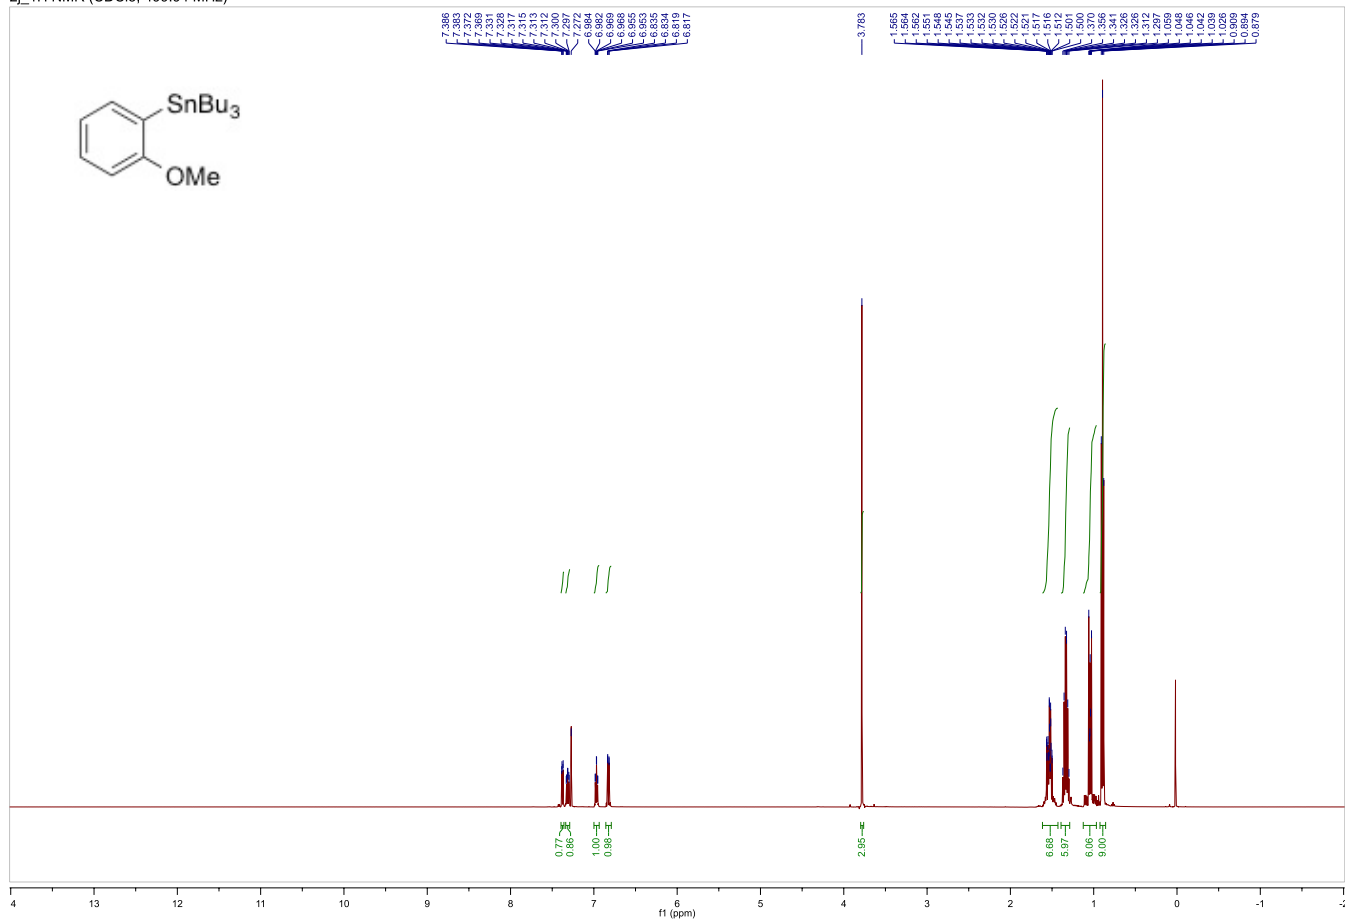2j\_13C NMR (CDCl<sub>3</sub>, 125.72 MHz)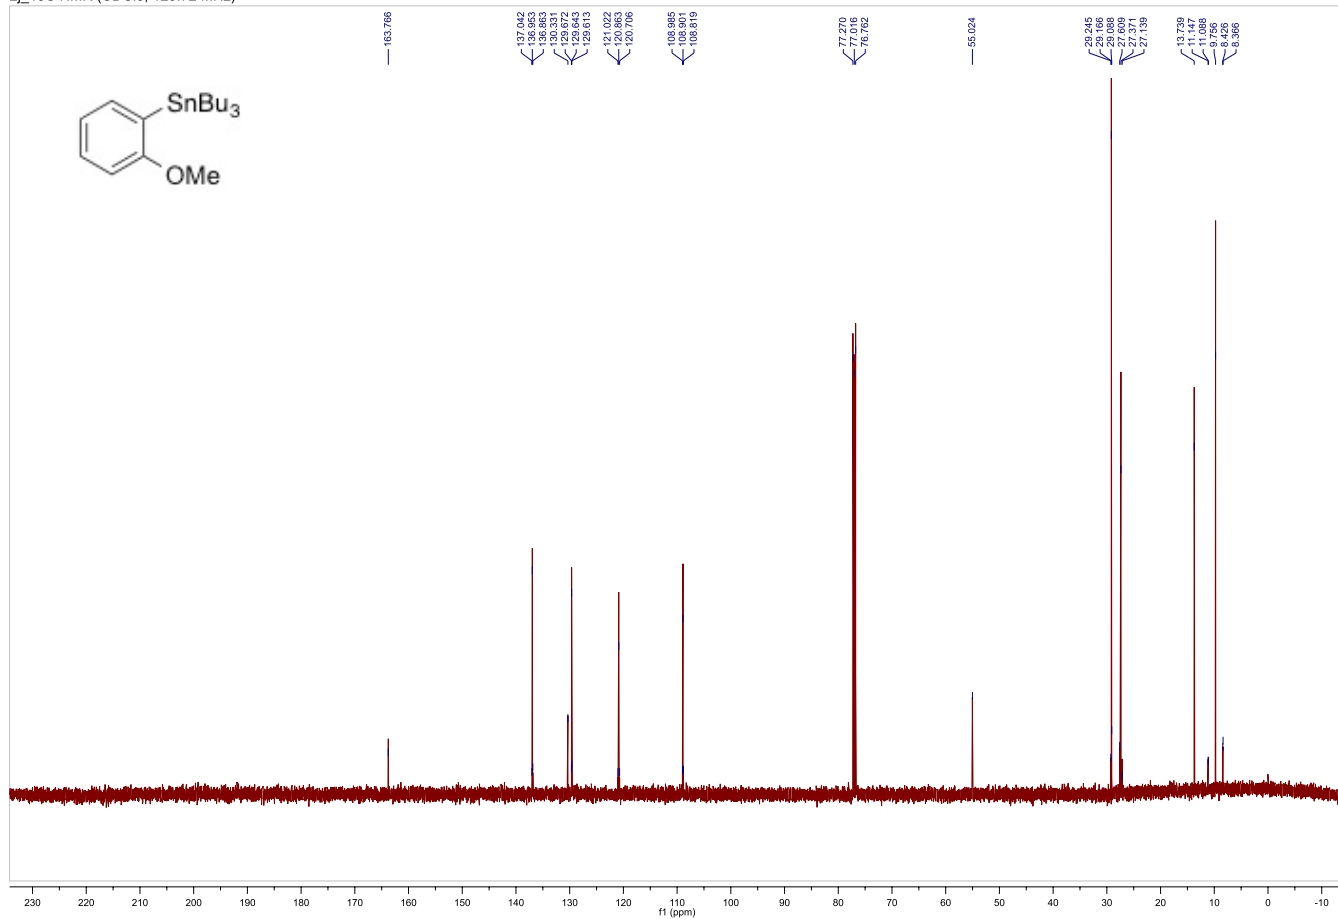

2k\_1H NMR (CDCl<sub>3</sub>, 499.94 MHz)

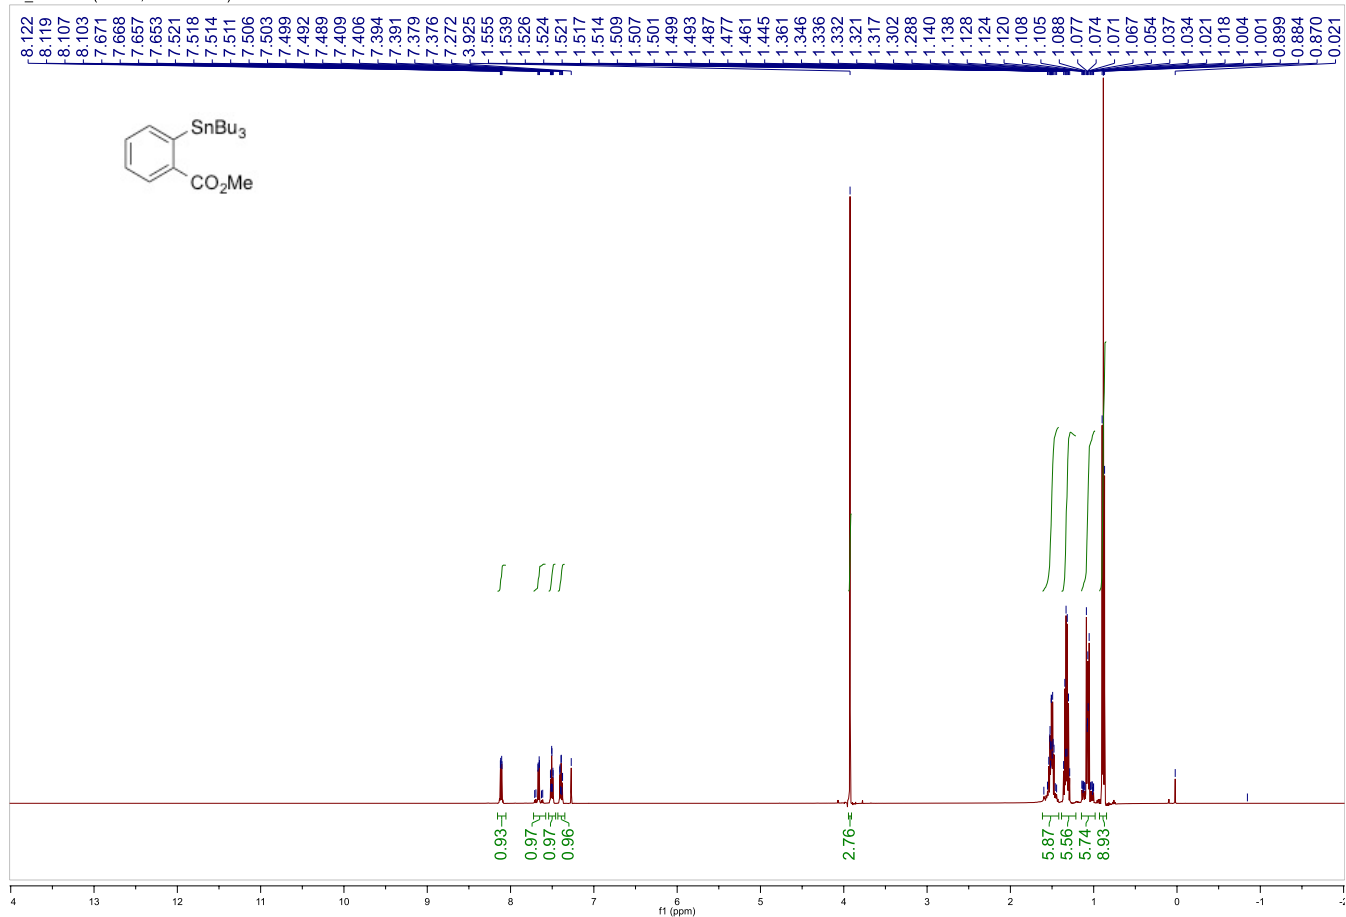

2k\_13C NMR (CDCl<sub>3</sub>, 125.72 MHz)

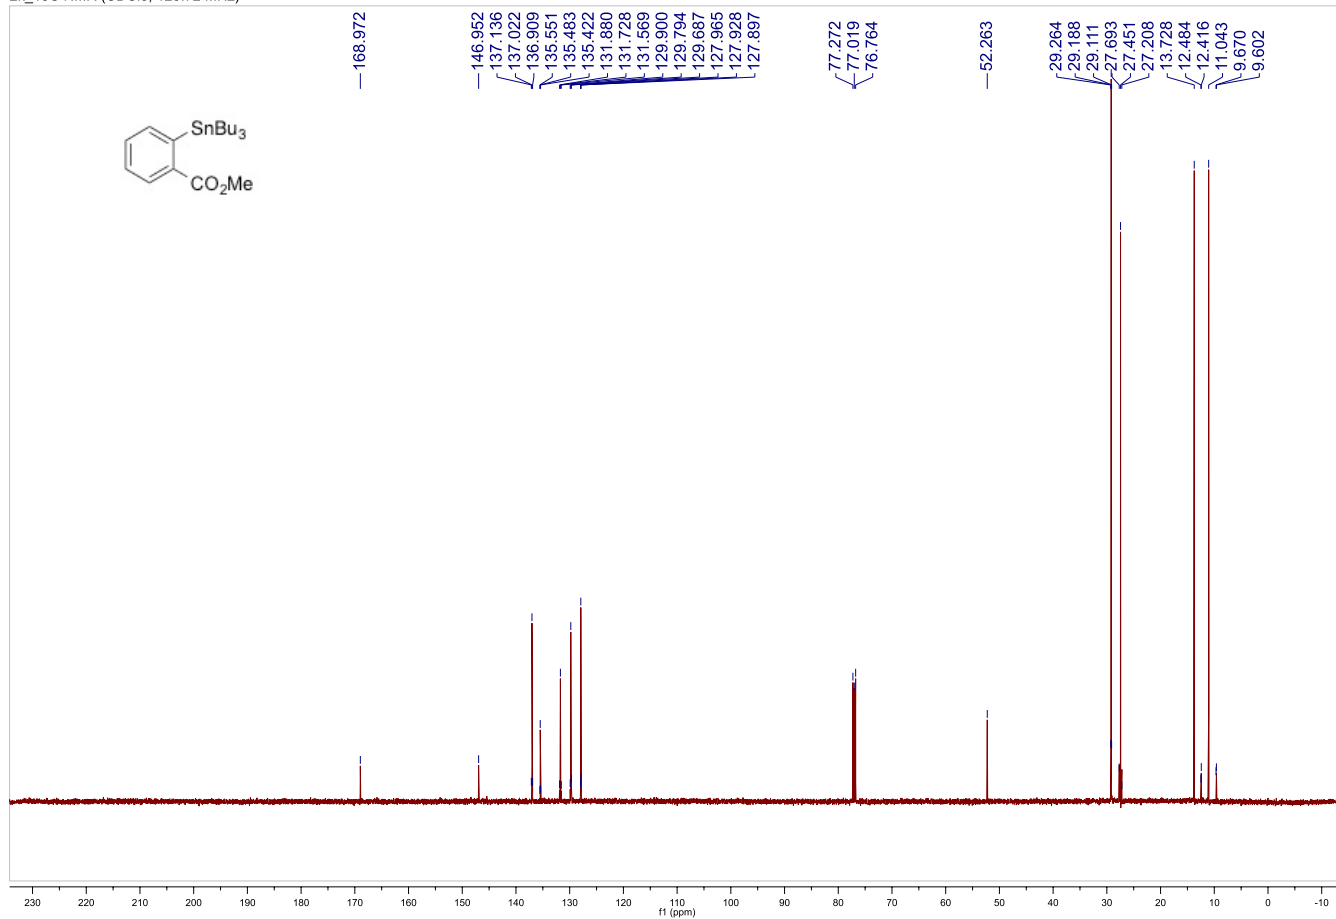

2l\_1H NMR (CDCl3, 399.83 MHz)

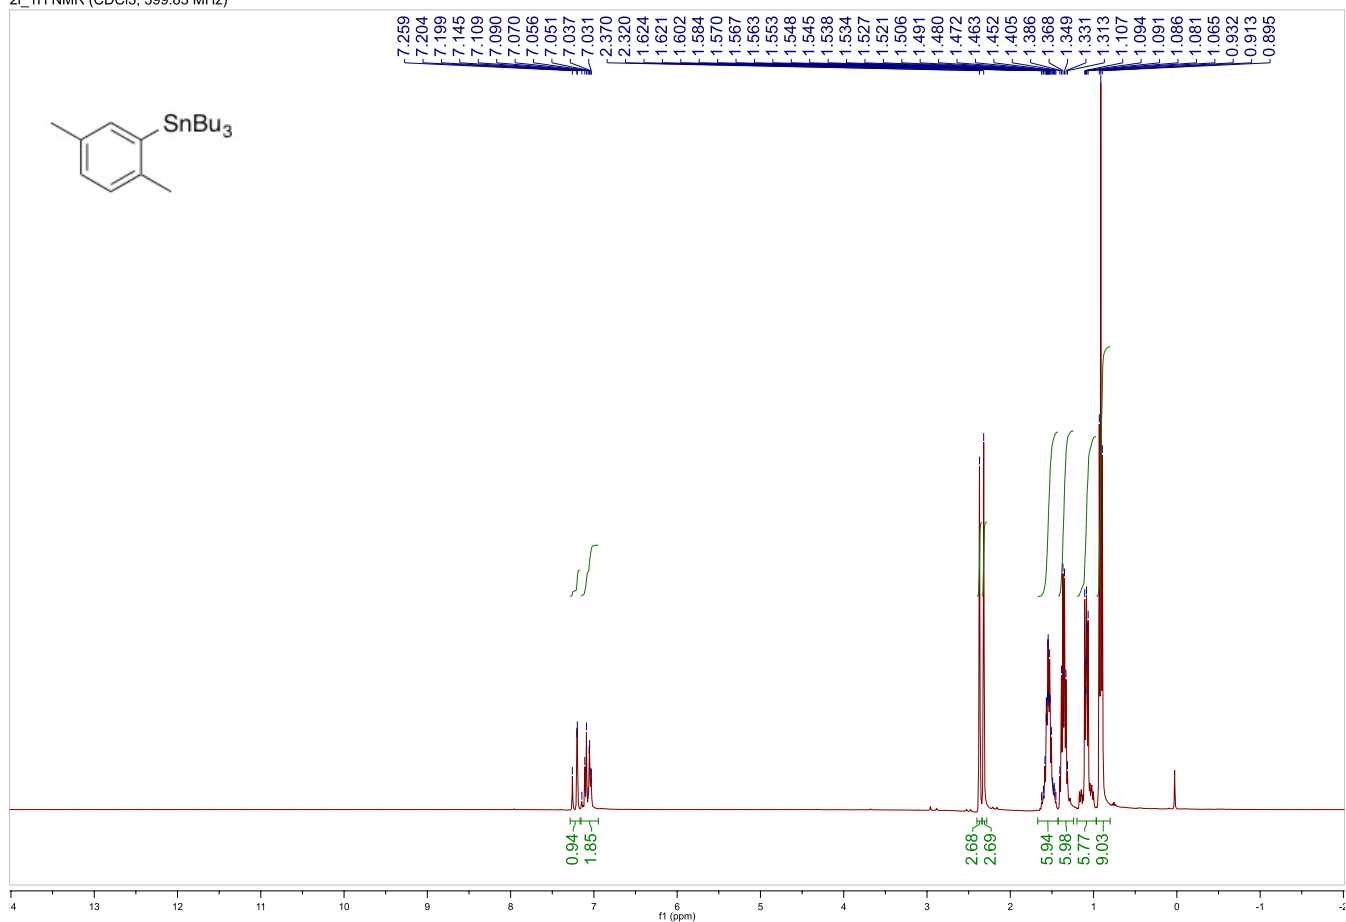

2l\_13C NMR (CDCl3, 100.55 MHz)

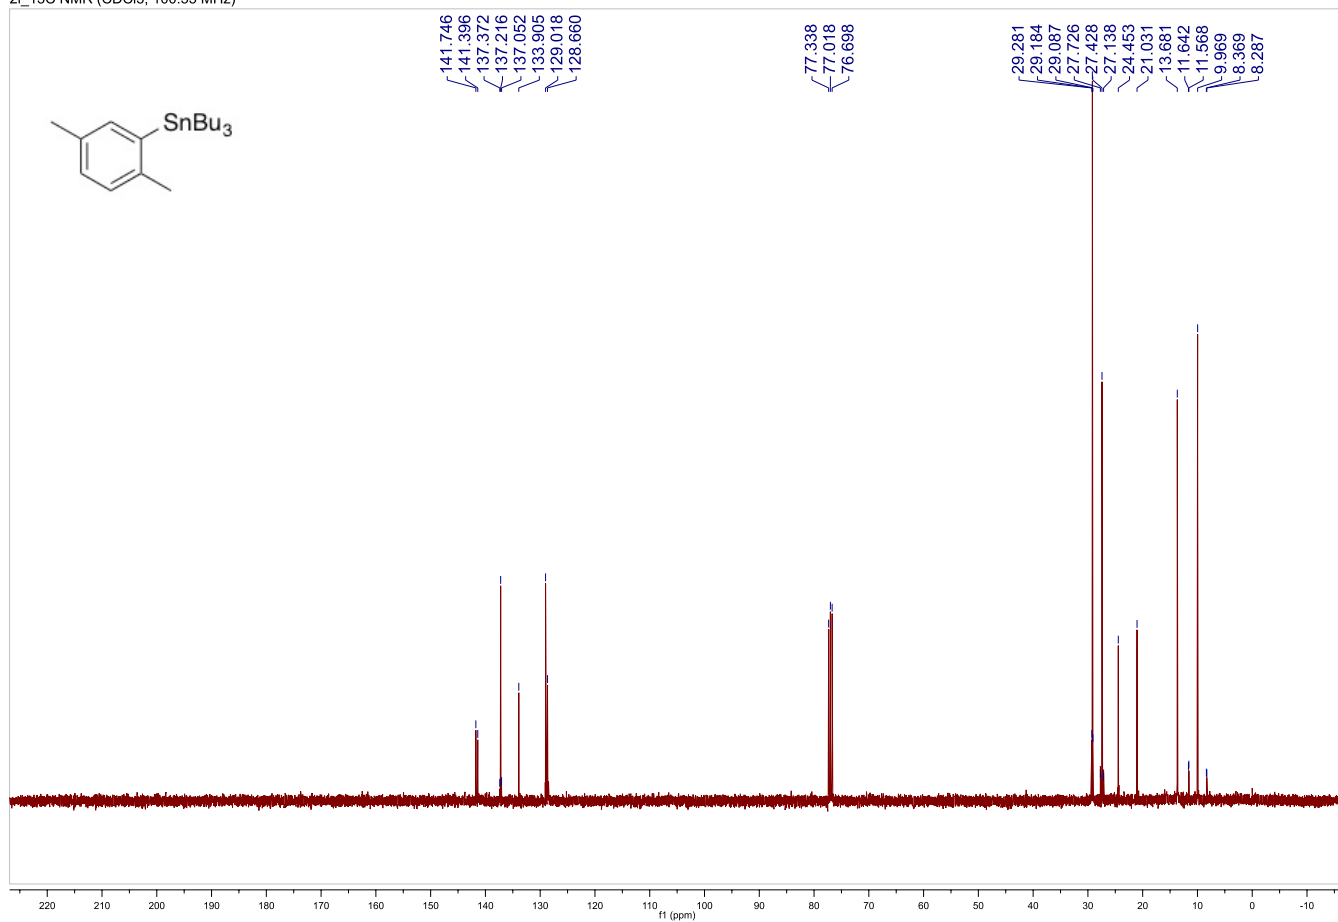

2m\_ 1H NMR (CDCl3, 399.83 MHz)

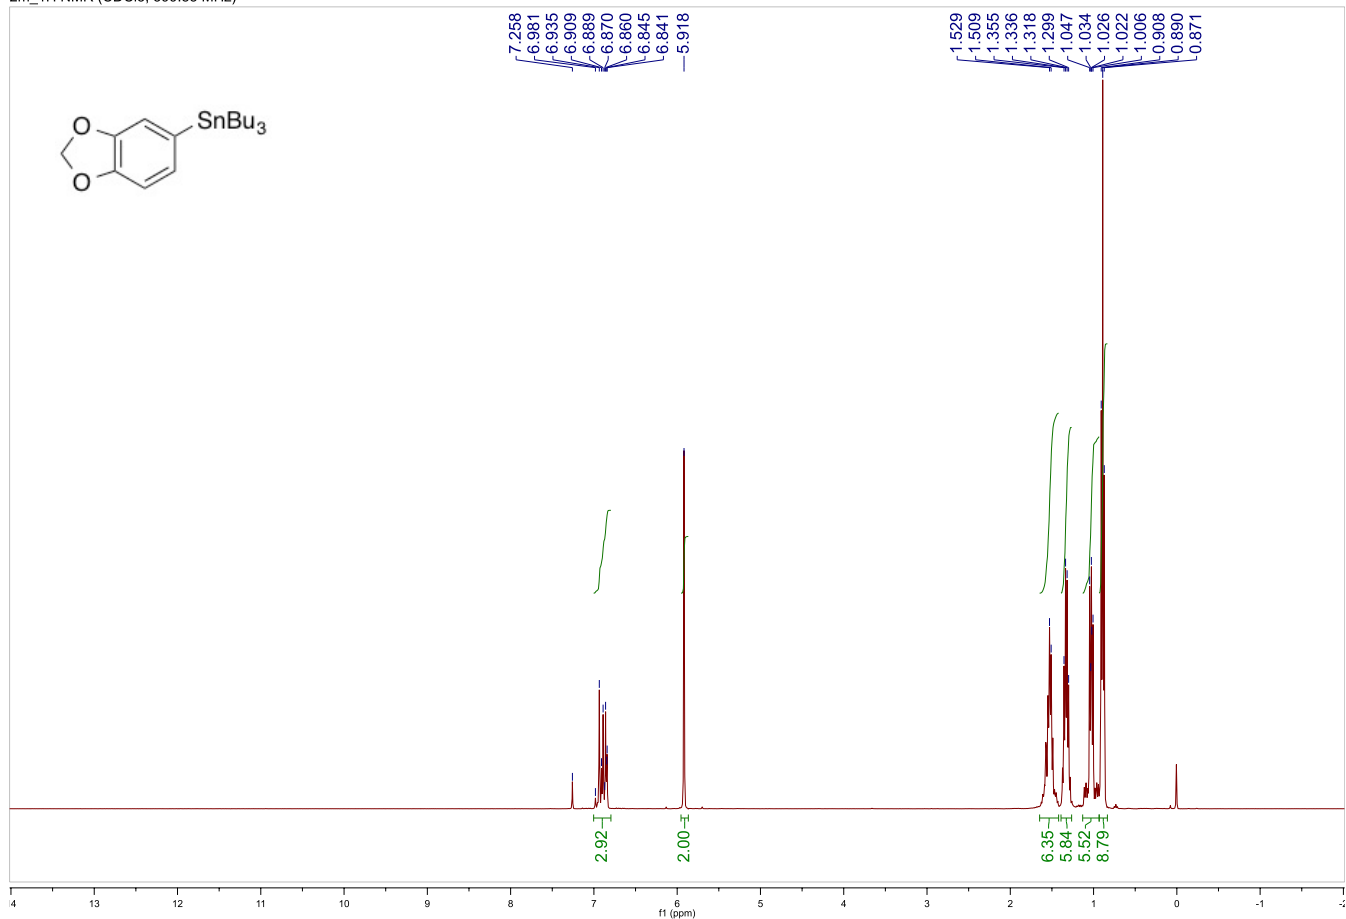

2m\_ 13C NMR (CDCl3, 100.55 MHz)

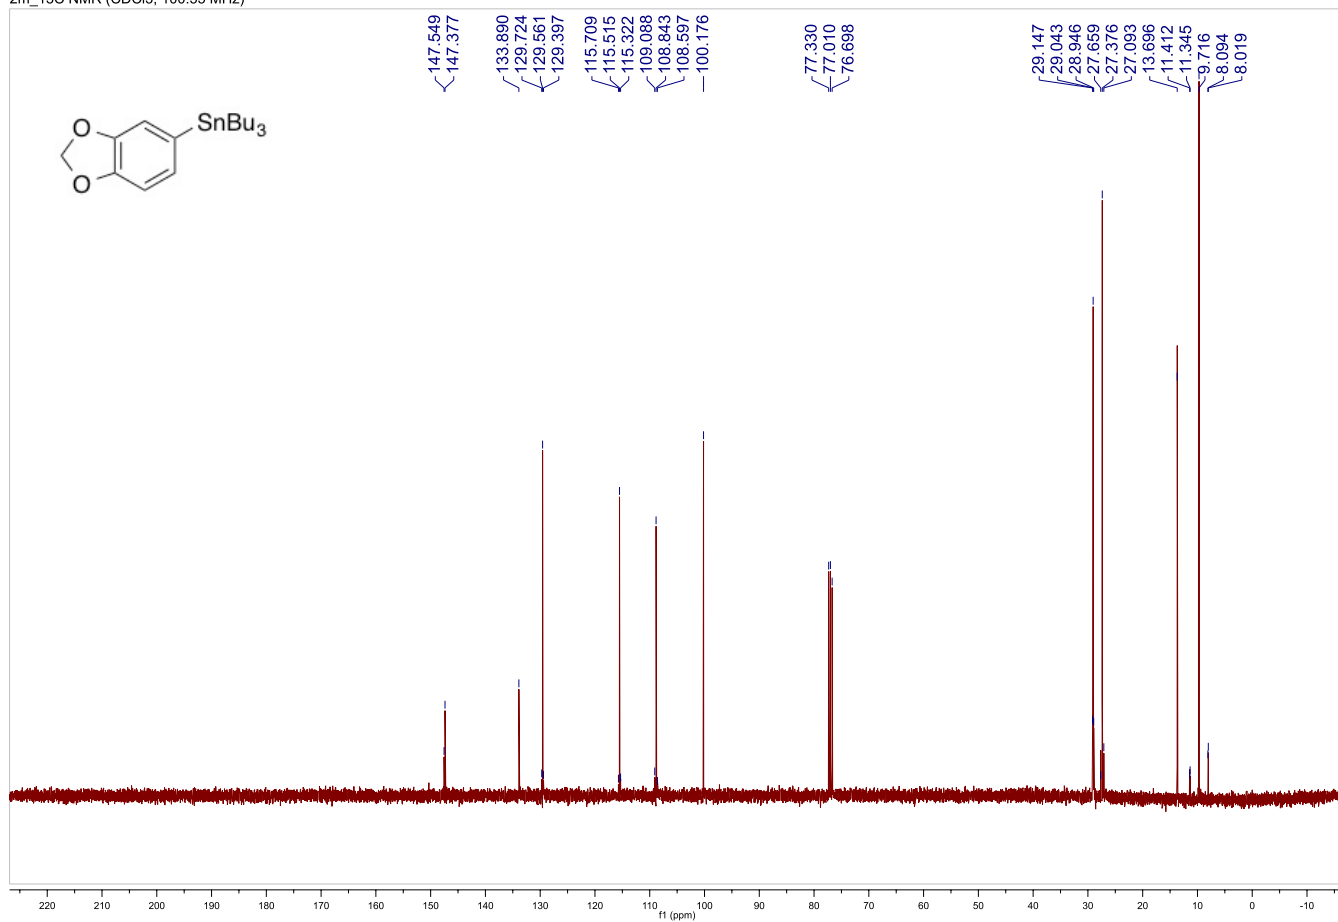

2n\_1H NMR (CDCl3, 399.83 MHz)

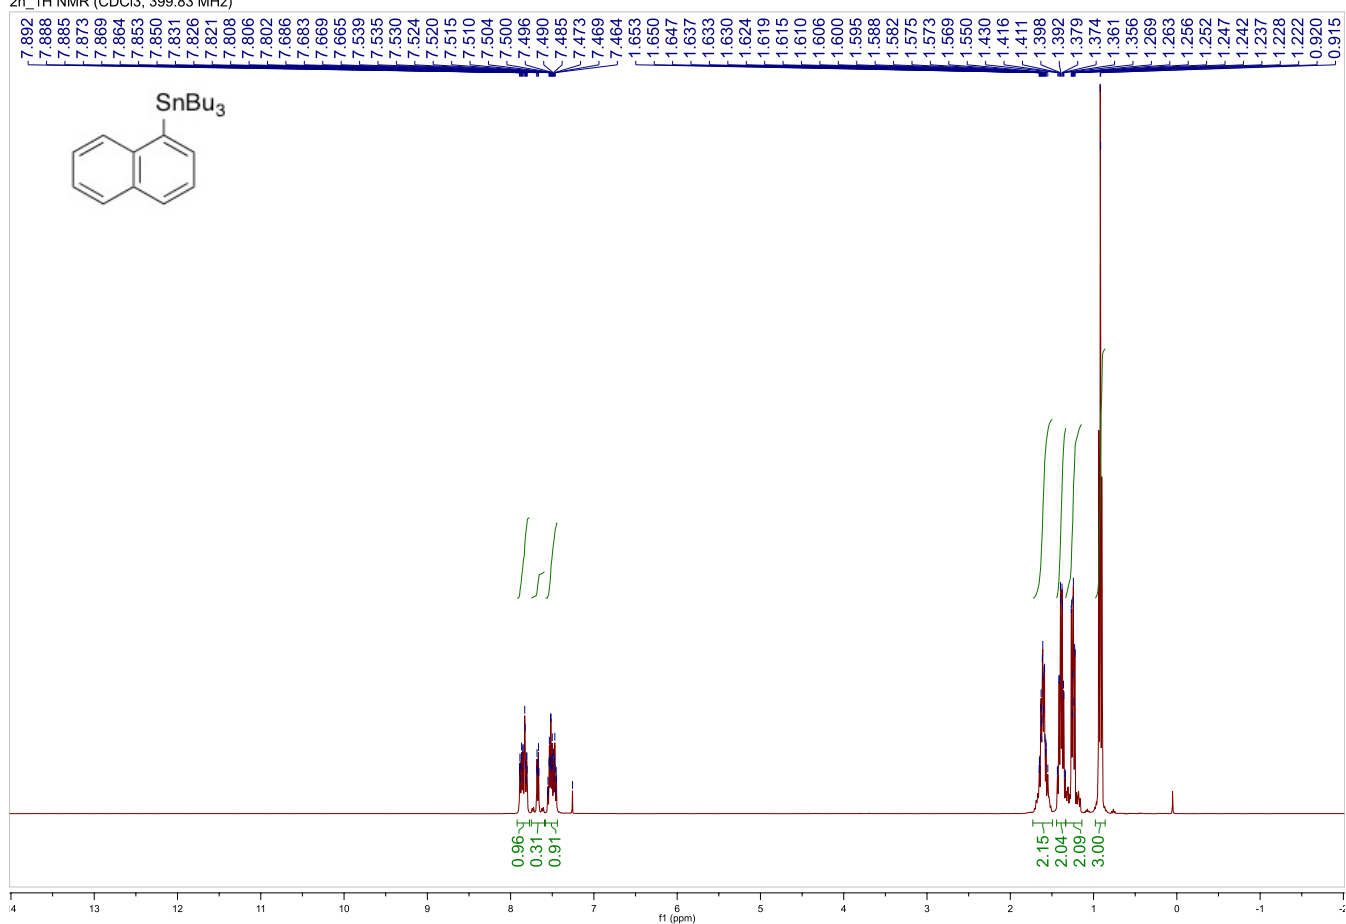

2n\_13C NMR (CDCl3, 100.55 MHz)

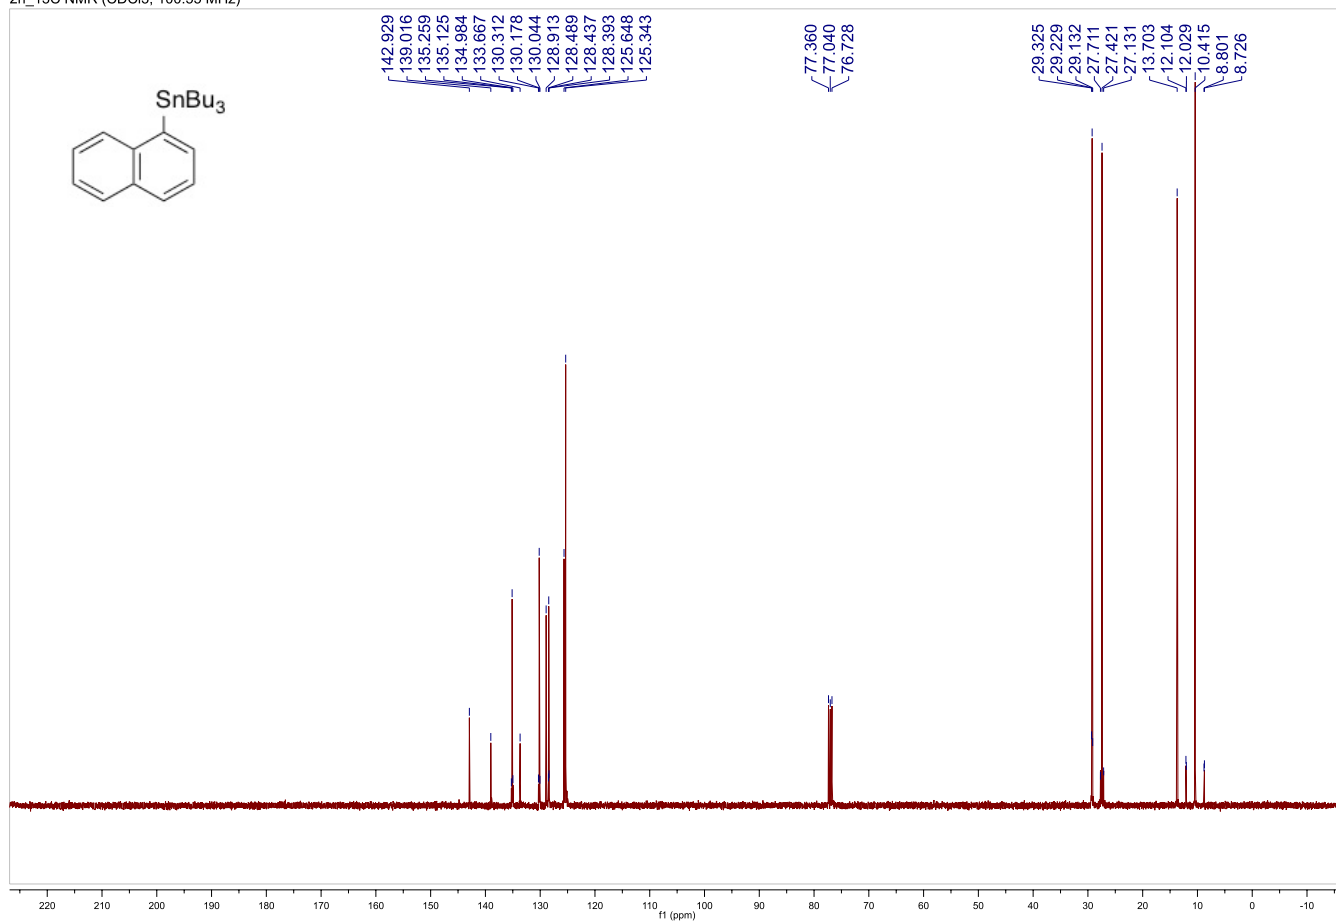

2o\_1H NMR (CDCl3, 399.83 MHz)

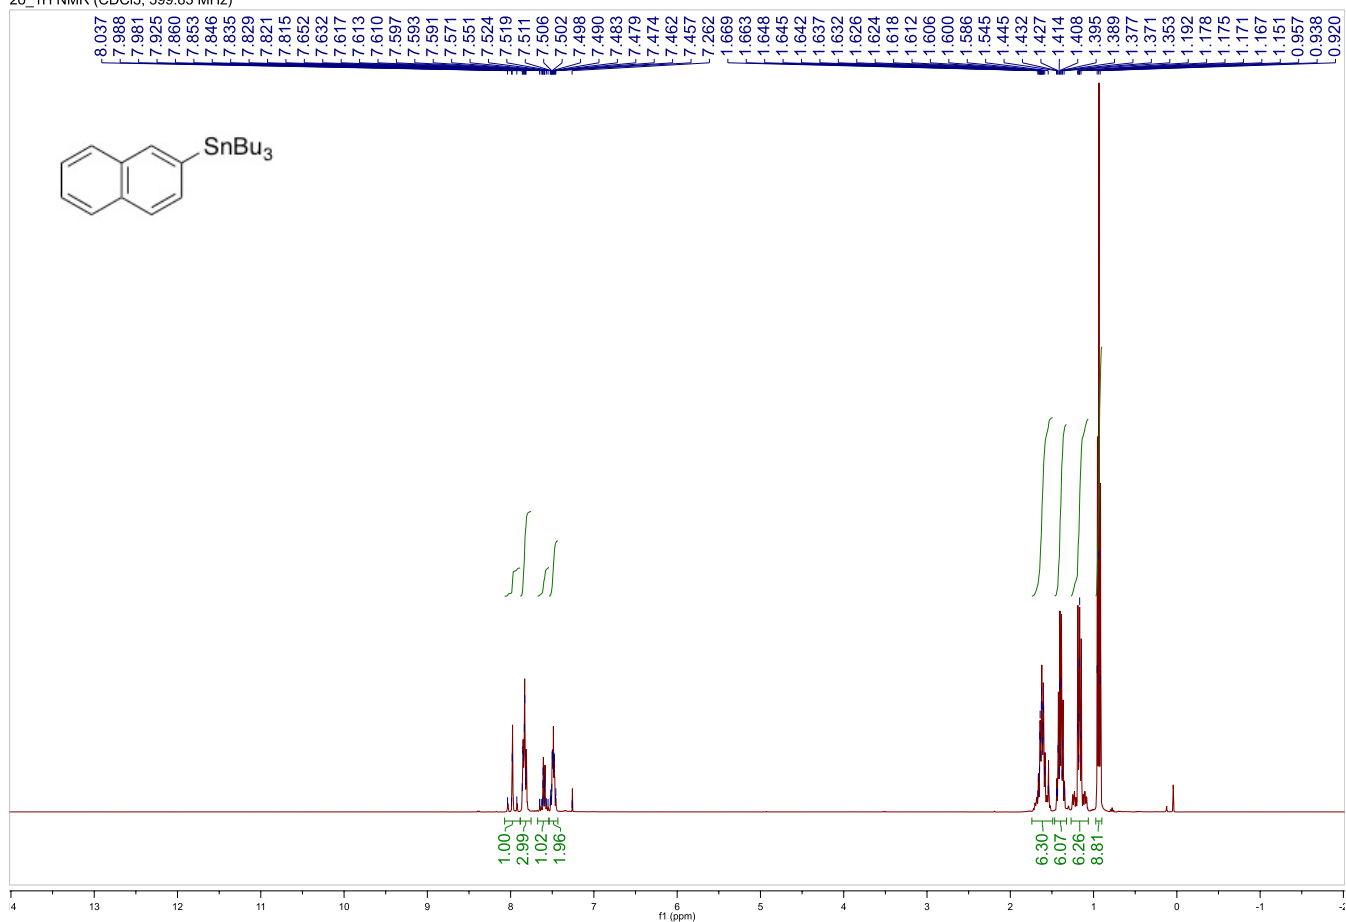

2o\_13C NMR (CDCl3, 100.55 MHz)

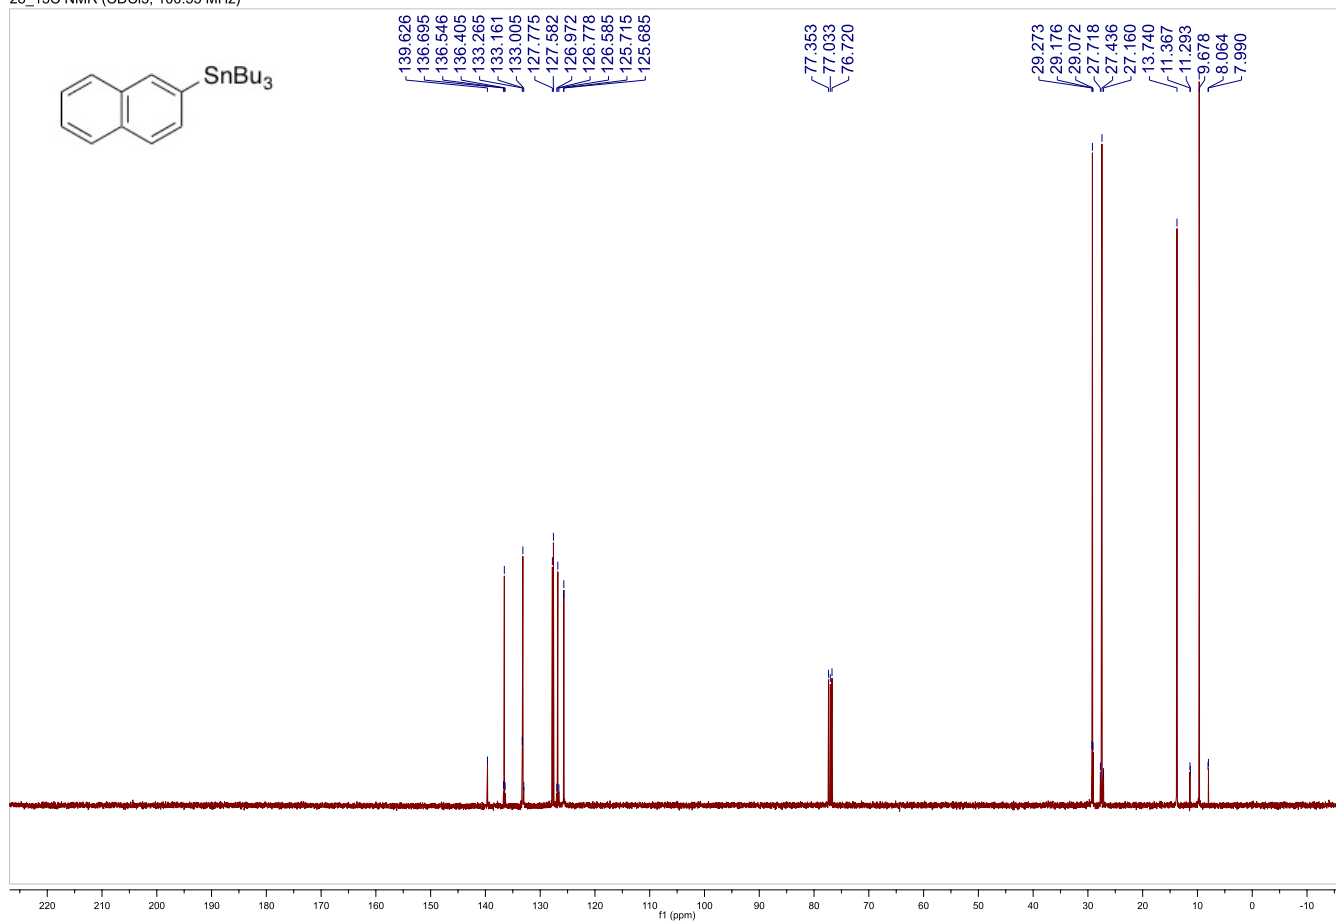

2p\_1H NMR (CDCl3, 499.82 MHz)

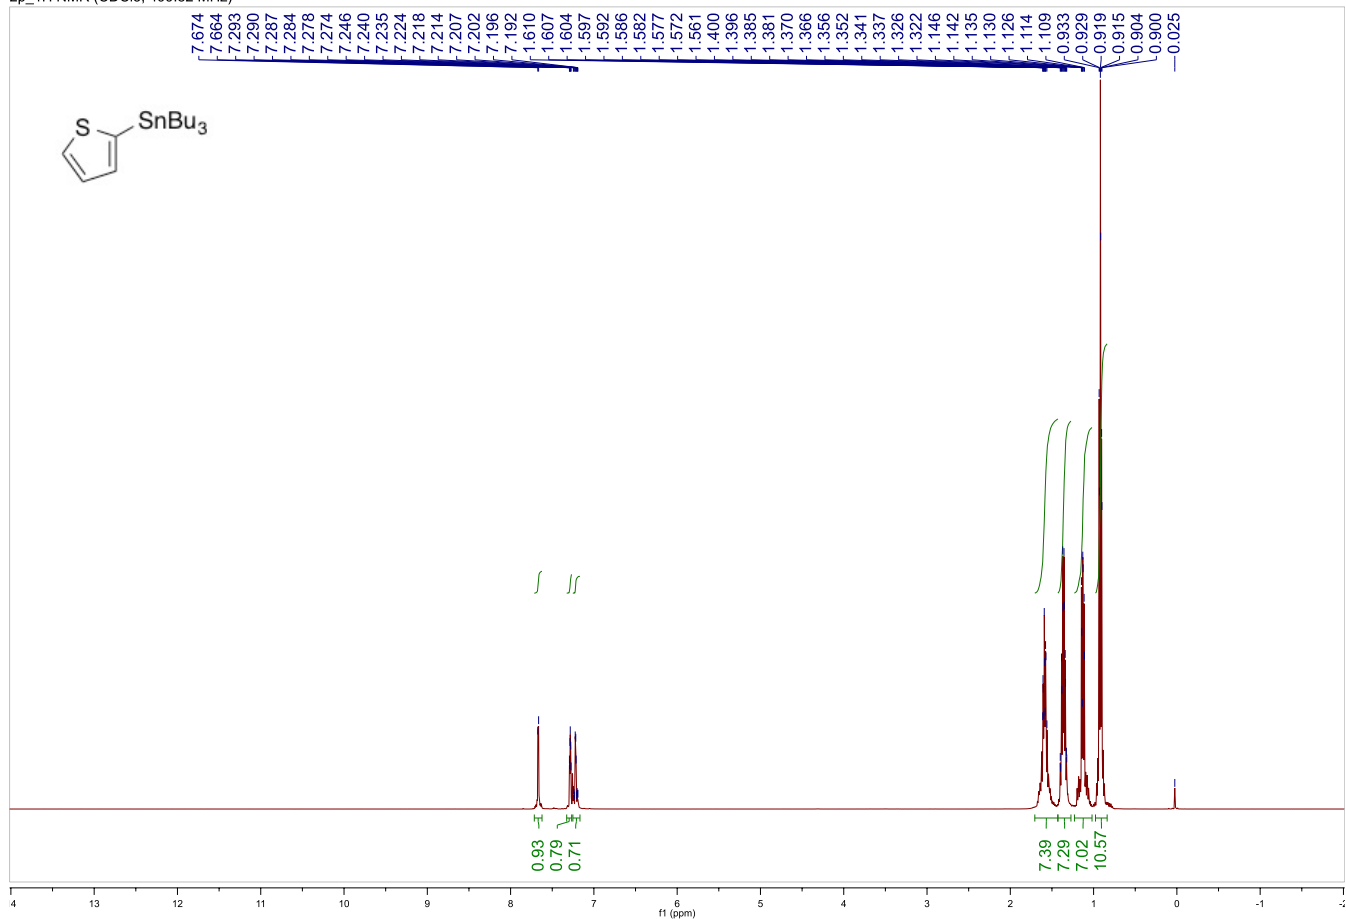

2p\_13C NMR (CDCl3, 125.69 MHz)

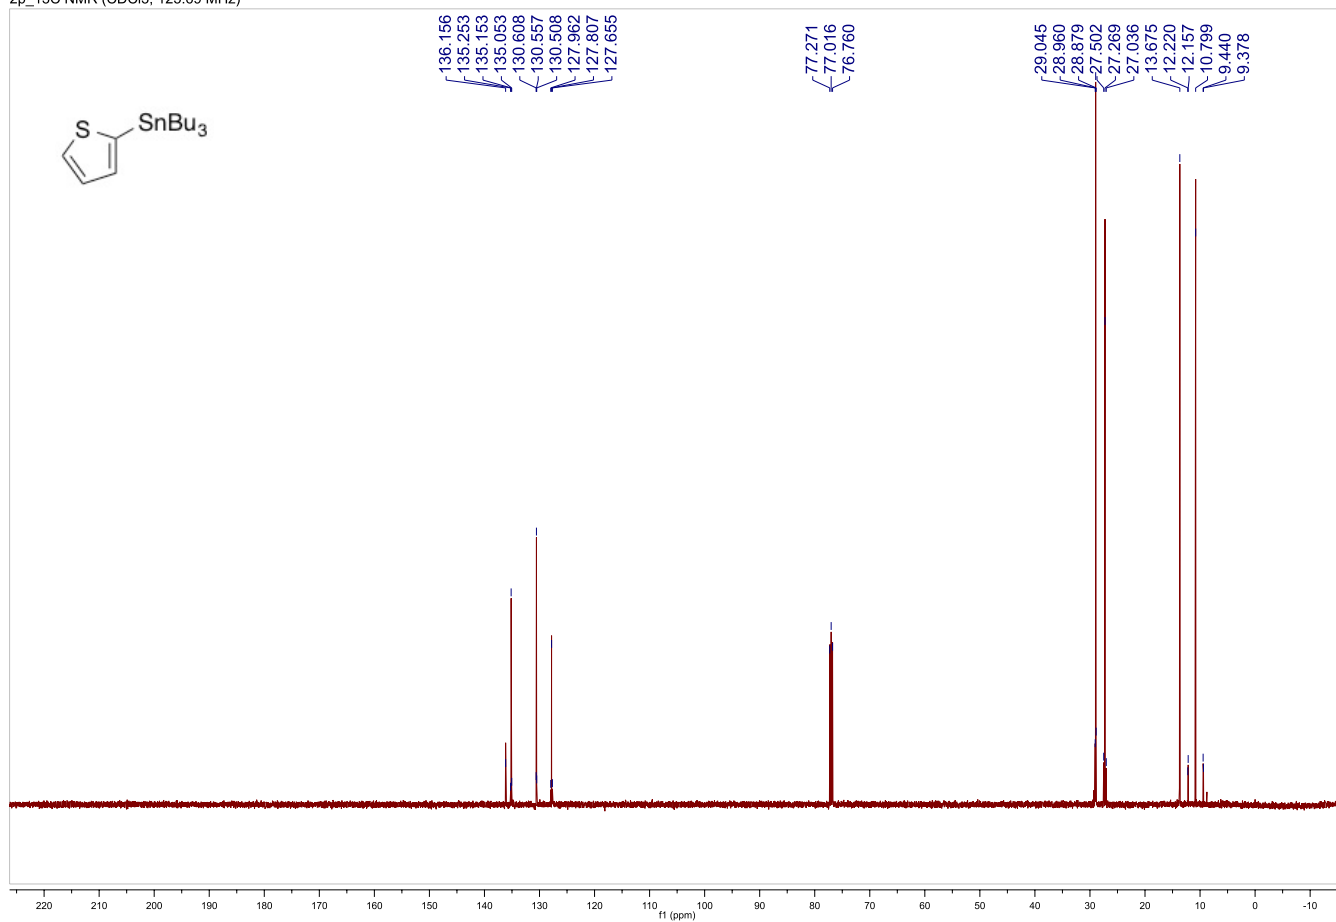



2q\_1H NMR (CDCl3, 399.83 MHz)

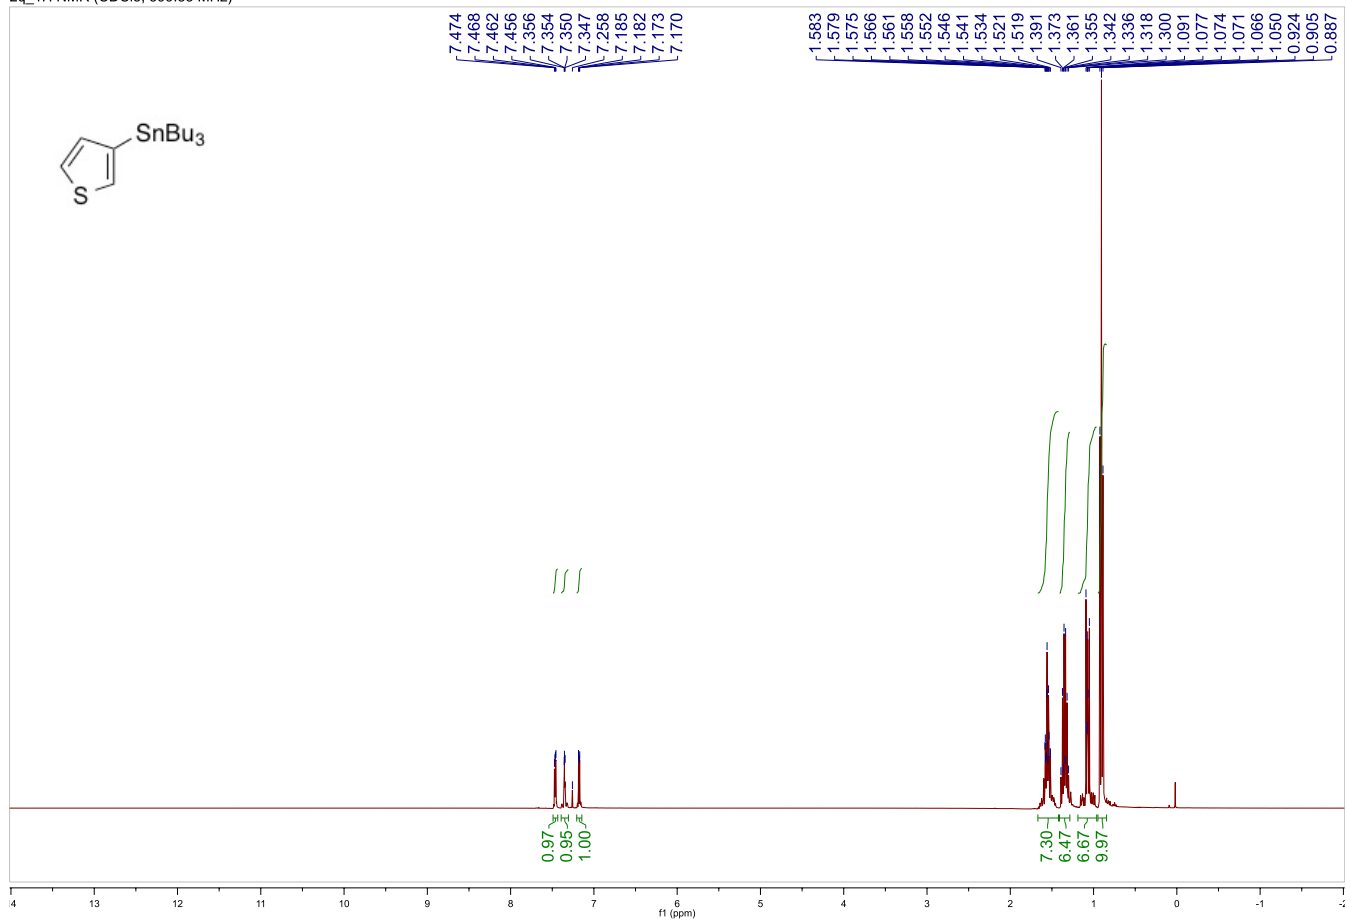

2q\_13C NMR (CDCl3, 100.55 MHz)

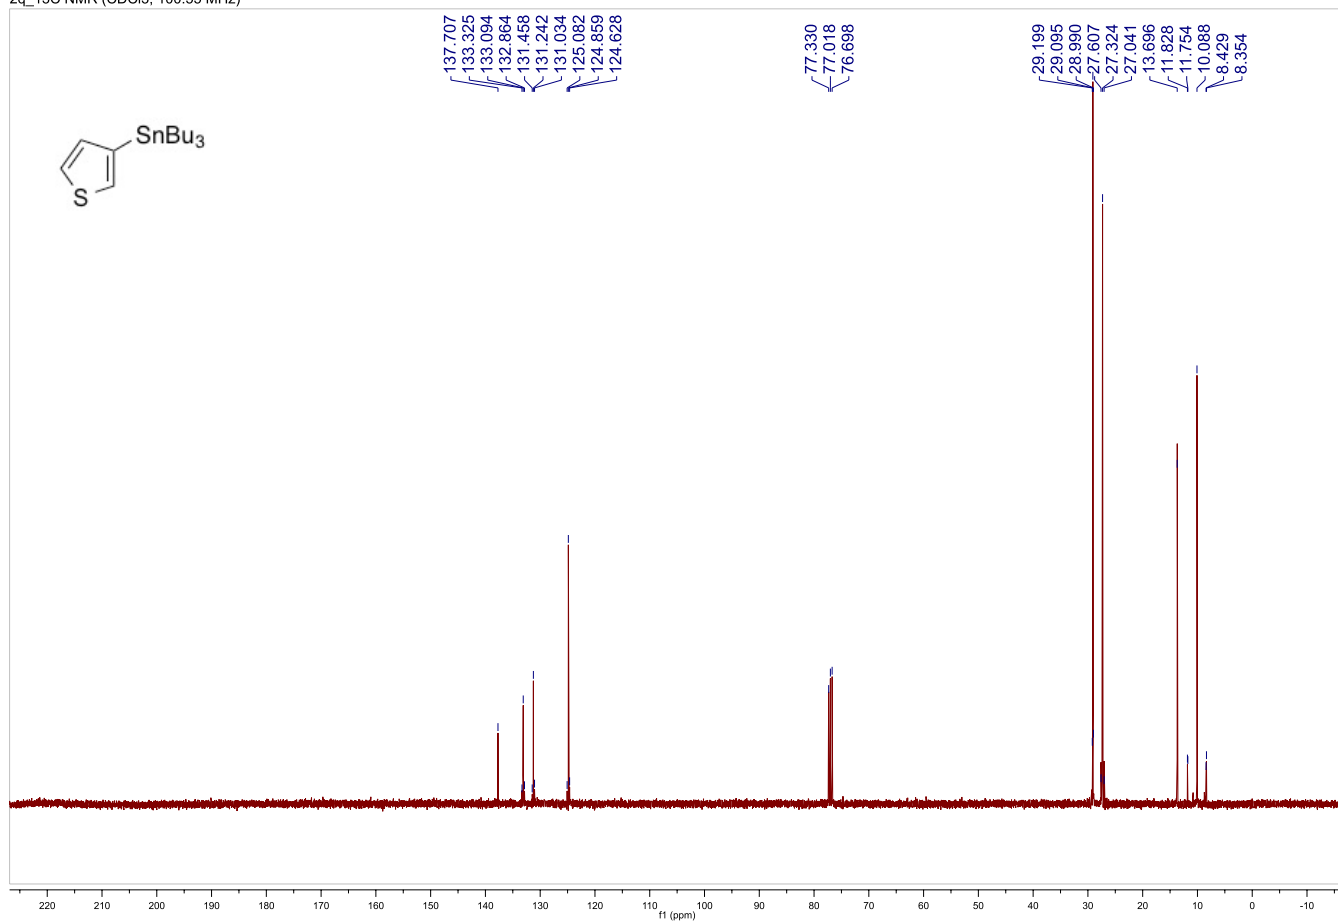

2r\_1H NMR (CDCl3, 399.83 MHz)

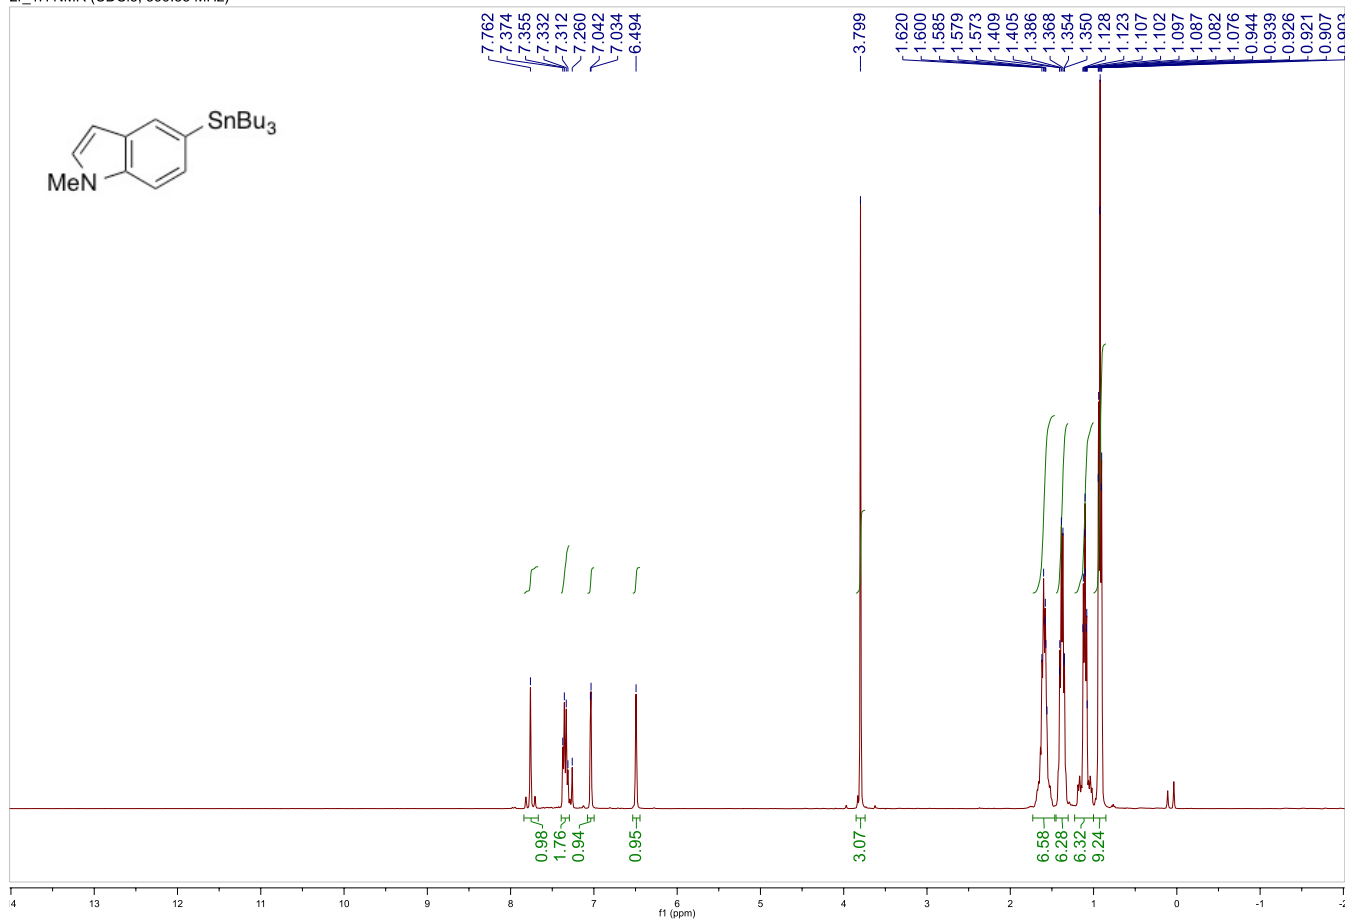

2r\_13C NMR (CDCl3, 100.55 MHz)

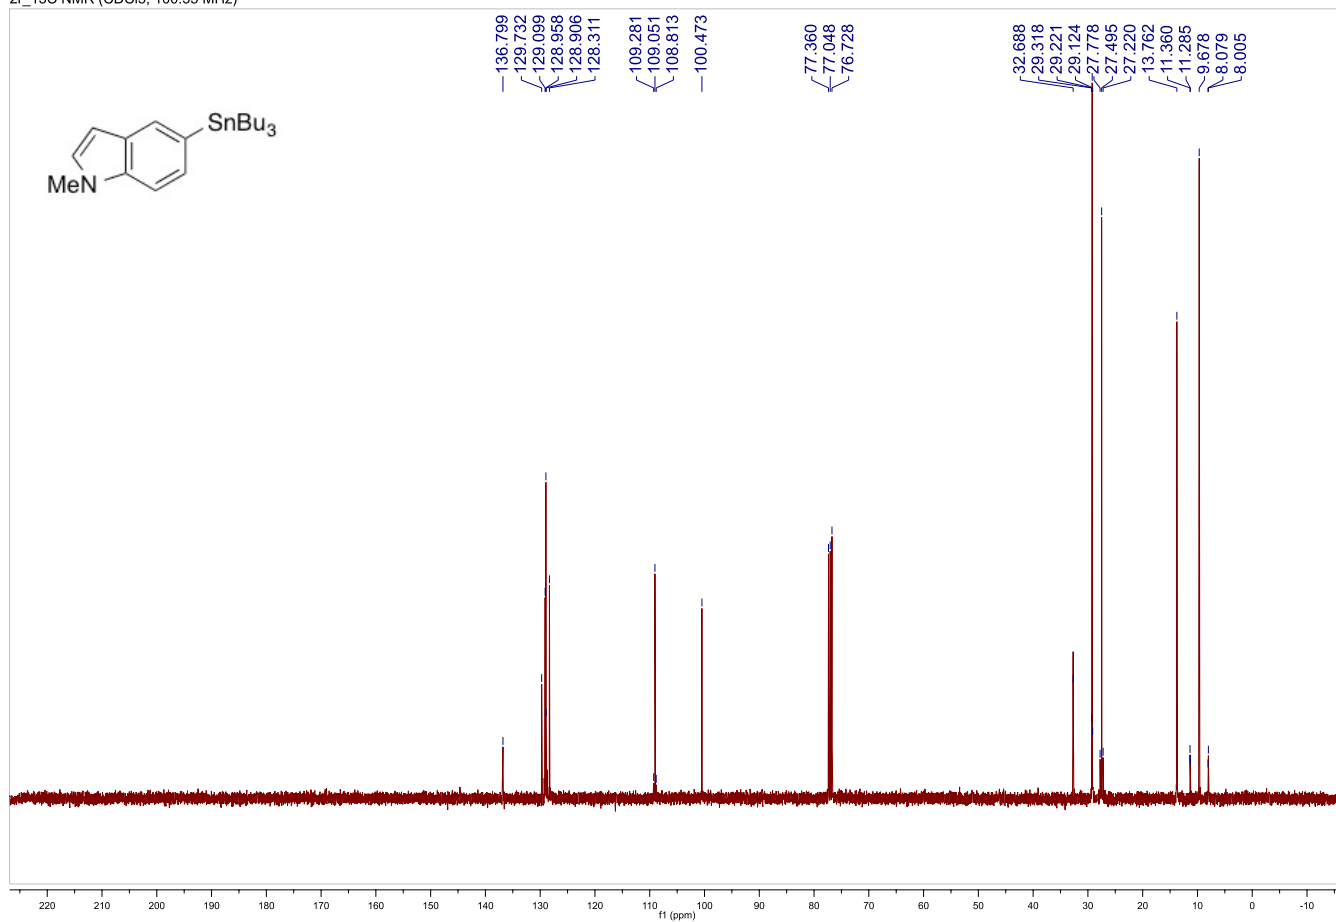

1s\_1H NMR (CDCl3, 399.83 MHz)

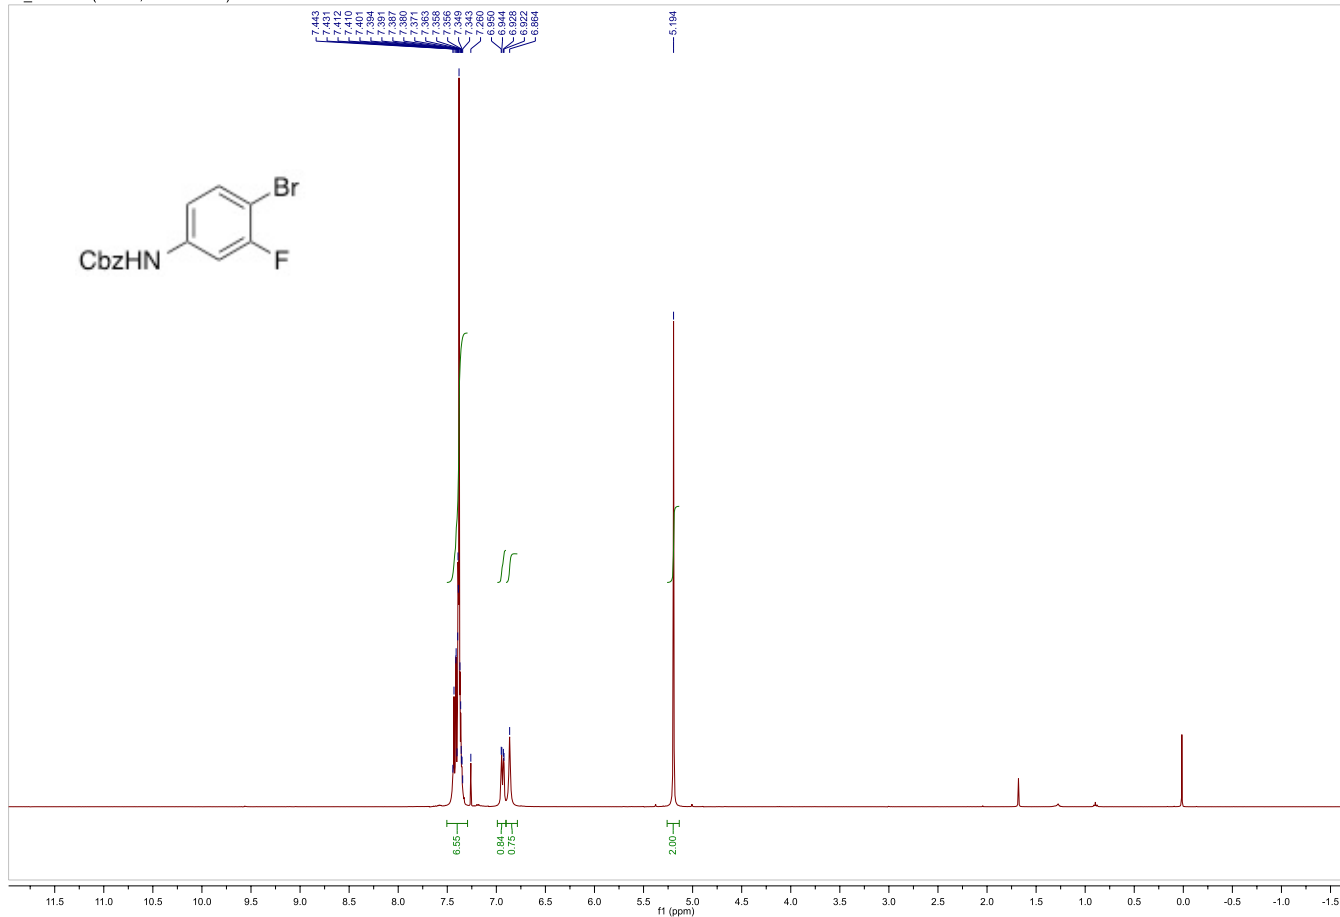

1s\_13C NMR (CDCl3, 100.55 MHz)

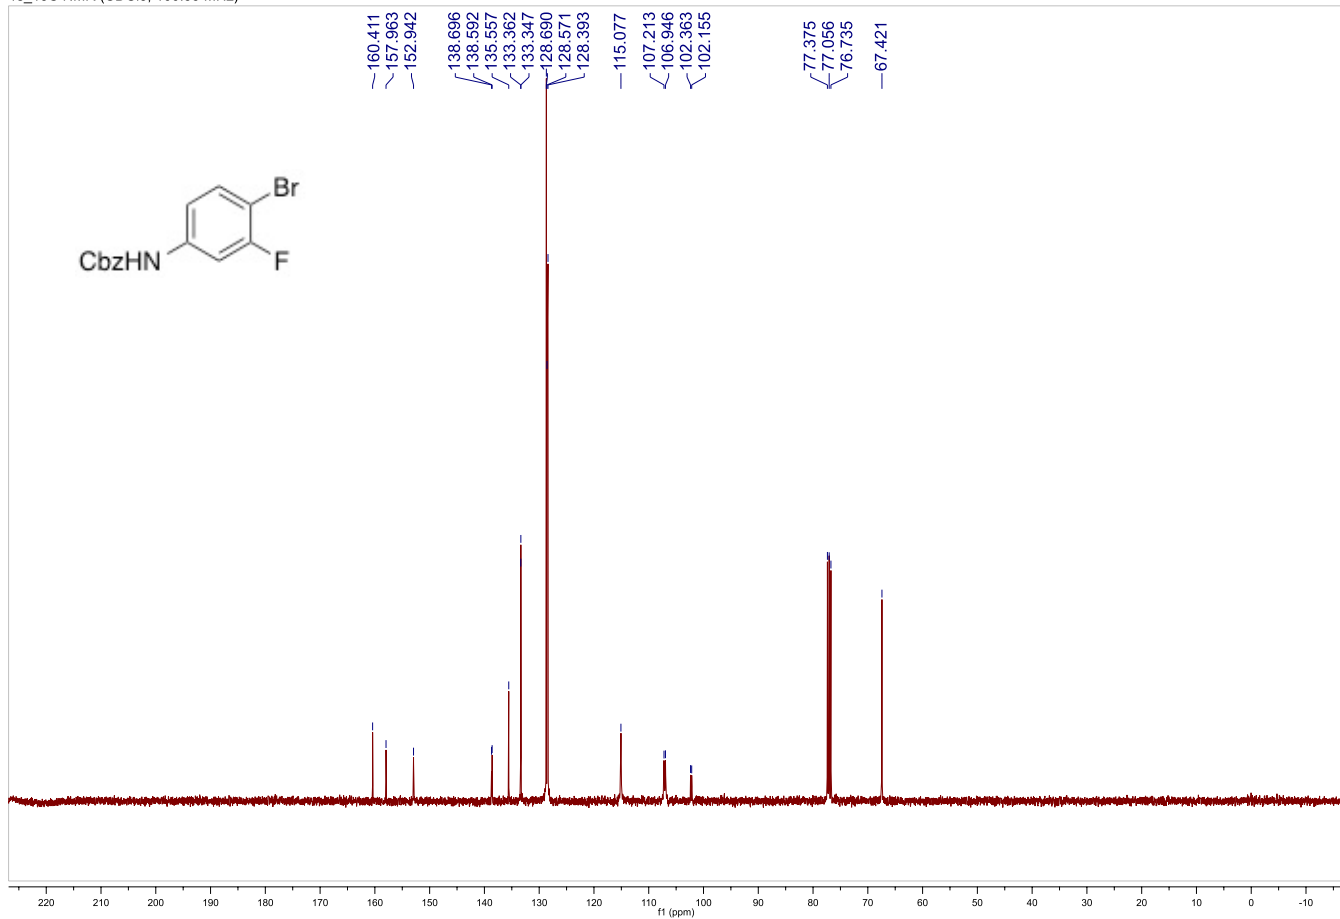

2s\_1H NMR (CDCl3, 399.83 MHz)

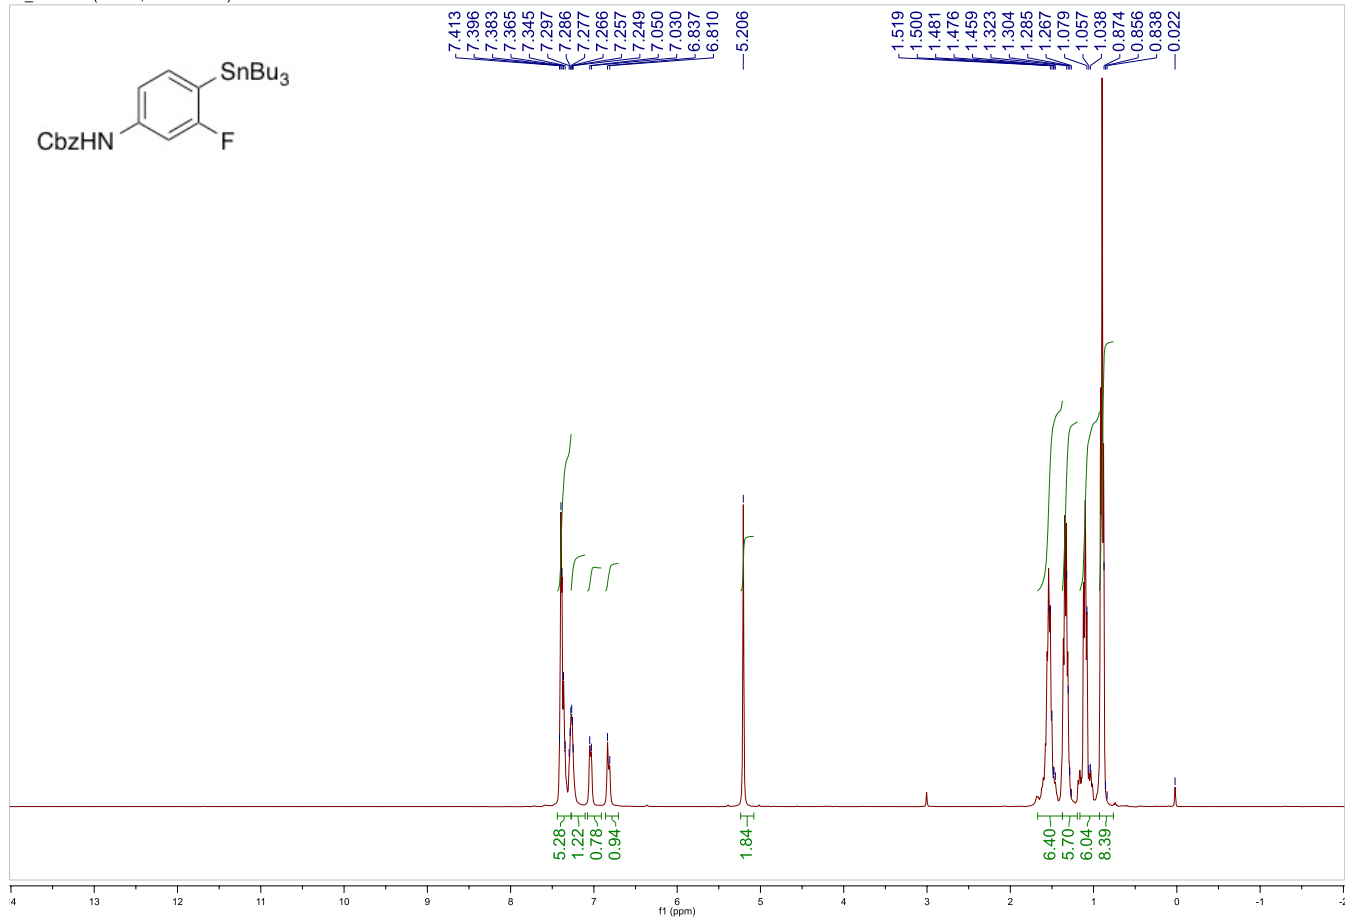

2s\_13C NMR (CDCl3, 100.55 MHz)

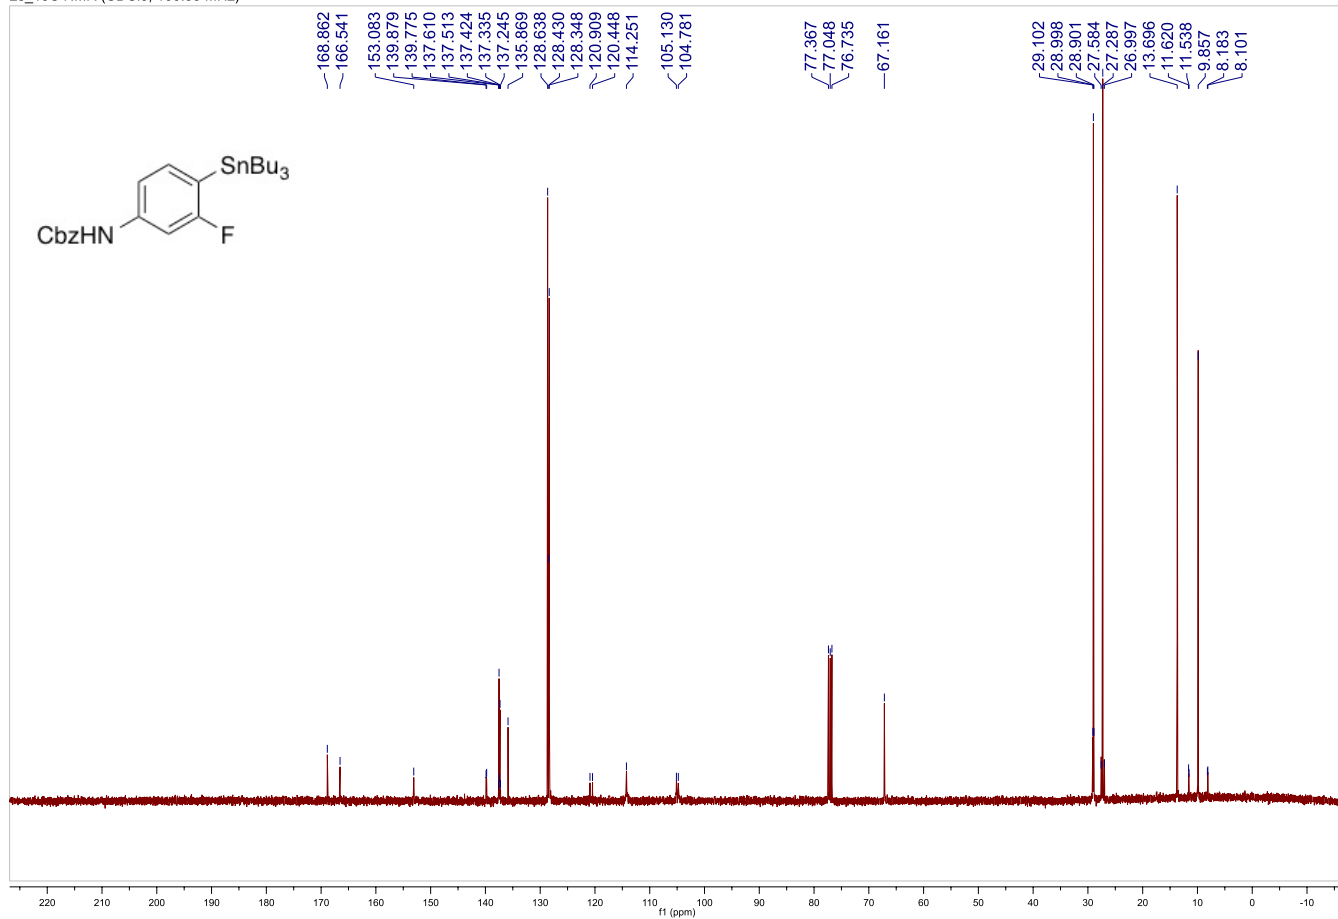

(E)-2t\_ 1H NMR (CDCl3, 399.83 MHz)

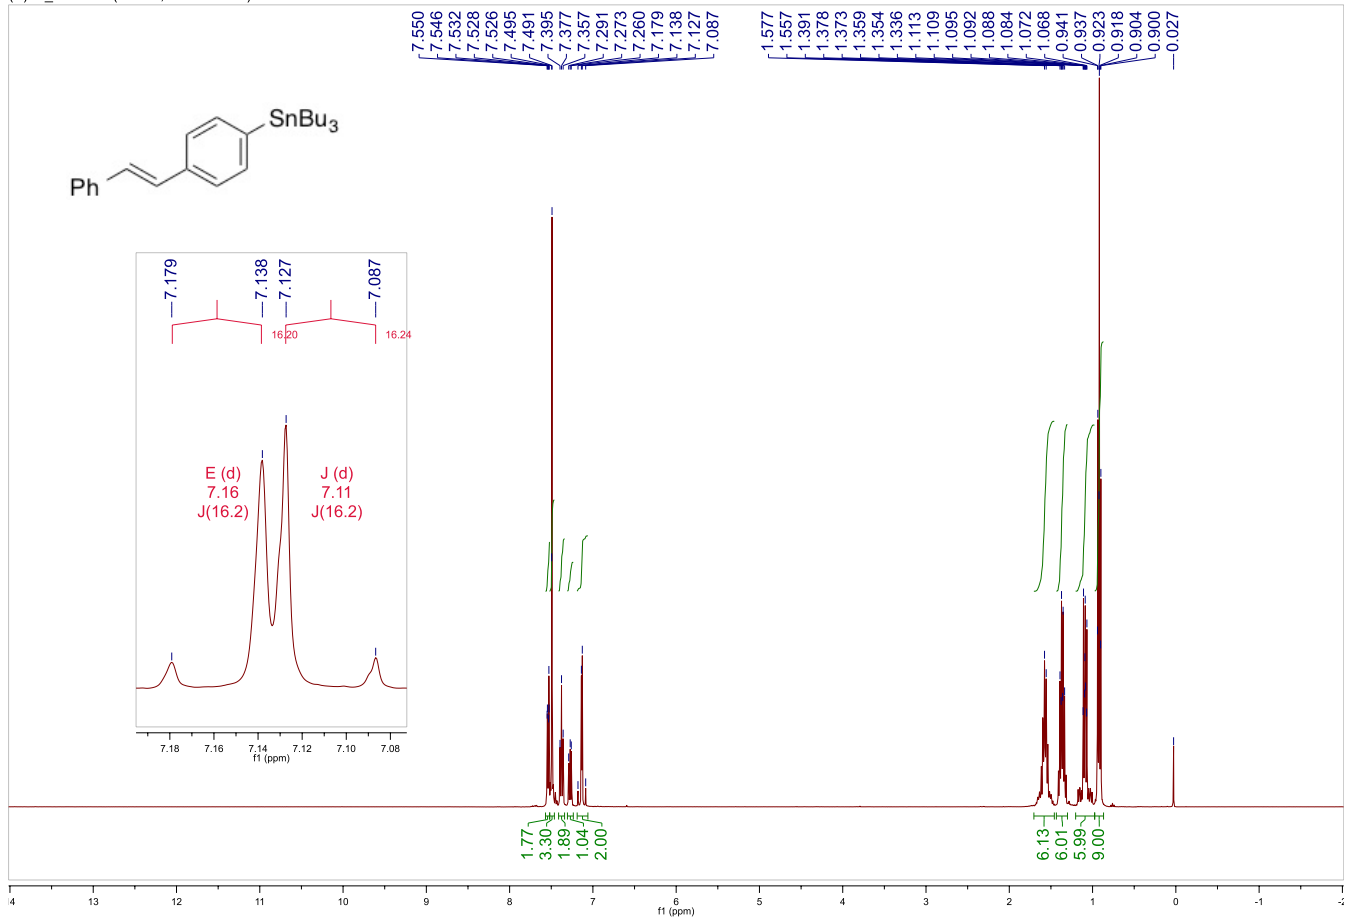

(E)-2t\_ 13C NMR (CDCl3, 125.69 MHz)

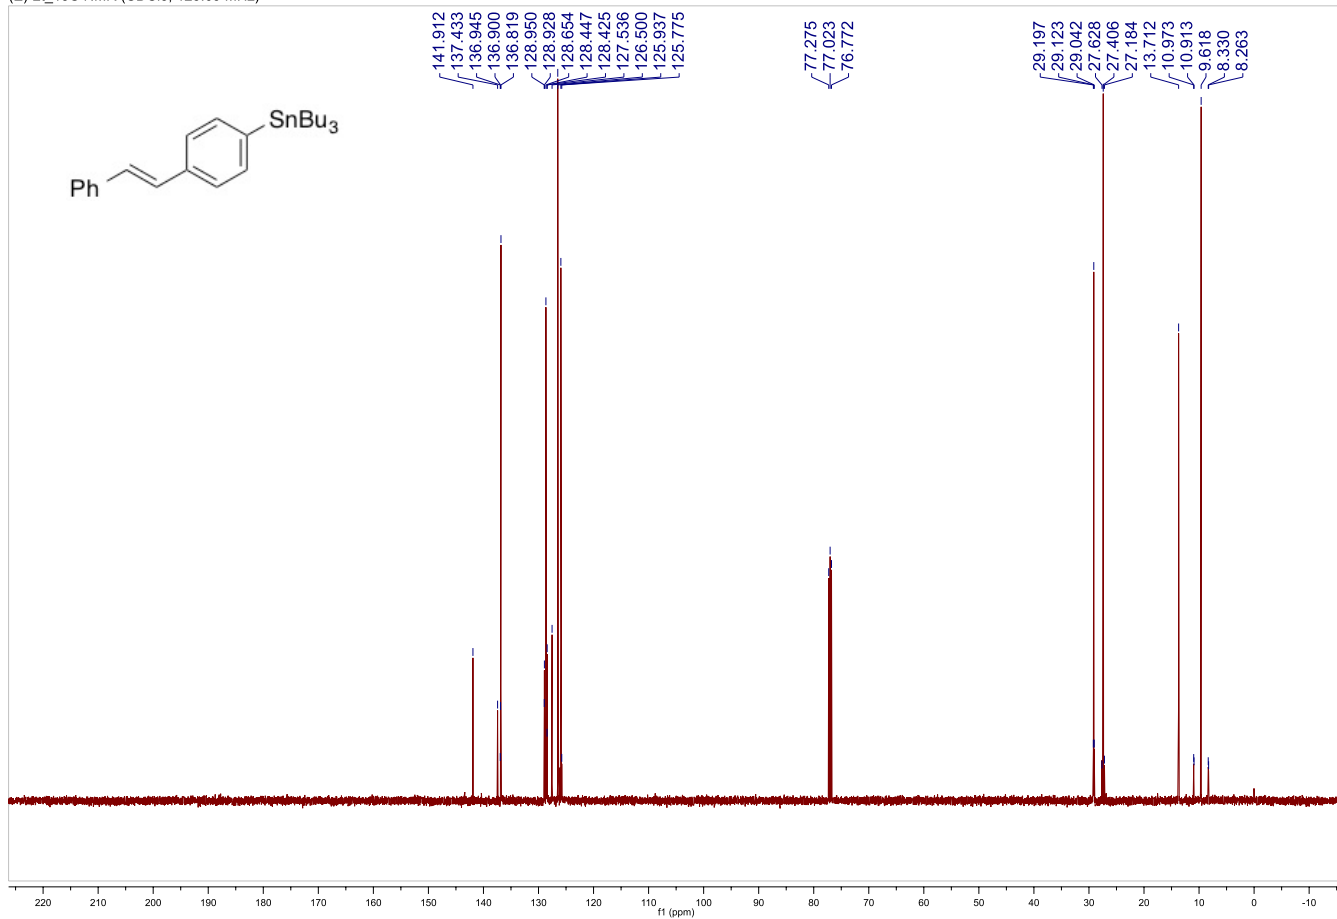

**<sup>1</sup>H NMR spectrum (CDCl<sub>3</sub>) of (E)-1-(4-(tributylstannyl)phenyl)ethyne.**

**Chemical structure:** C#CC1=CC=C(C=C1)C2=CC=CC=C2[Sn](CCCC)(CCCC)CCCC

**Peak list (ppm):** 1.619, 1.608, 1.605, 1.602, 1.599, 1.588, 1.583, 1.573, 1.569, 1.567, 1.427, 1.417, 1.414, 1.411, 1.402, 1.387, 1.372, 1.358, 1.343, 1.110, 1.104, 1.099, 1.087, 1.093, 1.090, 1.088, 1.077, 1.071, 0.954, 0.940, 0.934, 0.925, 6.624, 7.238, 7.243, 7.248, 7.252, 7.264, 7.267, 7.268, 7.270, 7.275, 7.279, 7.293, 7.296, 7.321, 7.323, 7.331, 7.336, 7.340, 7.368, 7.371, 7.382, 7.384, 7.387.

**Integration values:** 6.12, 6.19, 5.48, 9.00 (for aliphatic protons); 1.62, 1.76, 4.41, 1.82 (for aromatic and alkyne protons).

**Inset:** Zoomed-in view of the alkyne proton peak at 6.624 ppm.

**Figure S10.**  $^{13}\text{C}$  NMR spectrum of **1** in  $\text{CDCl}_3$ . The chemical structure of **1** is shown in the top left corner. The spectrum displays peaks corresponding to the carbon atoms in the molecule, with chemical shifts ranging from approximately 140 ppm to 10 ppm. The x-axis is labeled  $\delta$  (ppm) and ranges from 230 to -10. The y-axis represents intensity. The peaks are labeled with their corresponding chemical shifts: 141.146, 137.466, 136.746, 136.457, 136.306, 136.154, 130.457, 130.434, 130.403, 130.077, 128.856, 128.461, 128.256, 128.234, 128.173, 128.143, 128.059, 127.005, 77.328, 77.010, 76.691, 29.200, 29.101, 29.002, 27.637, 27.387, 27.356, 27.083, 13.708, 13.670, 13.594, 11.288, 11.212, 9.596, 7.980, and 7.904.

2u\_1H NMR (CDCl3, 399.83 MHz)

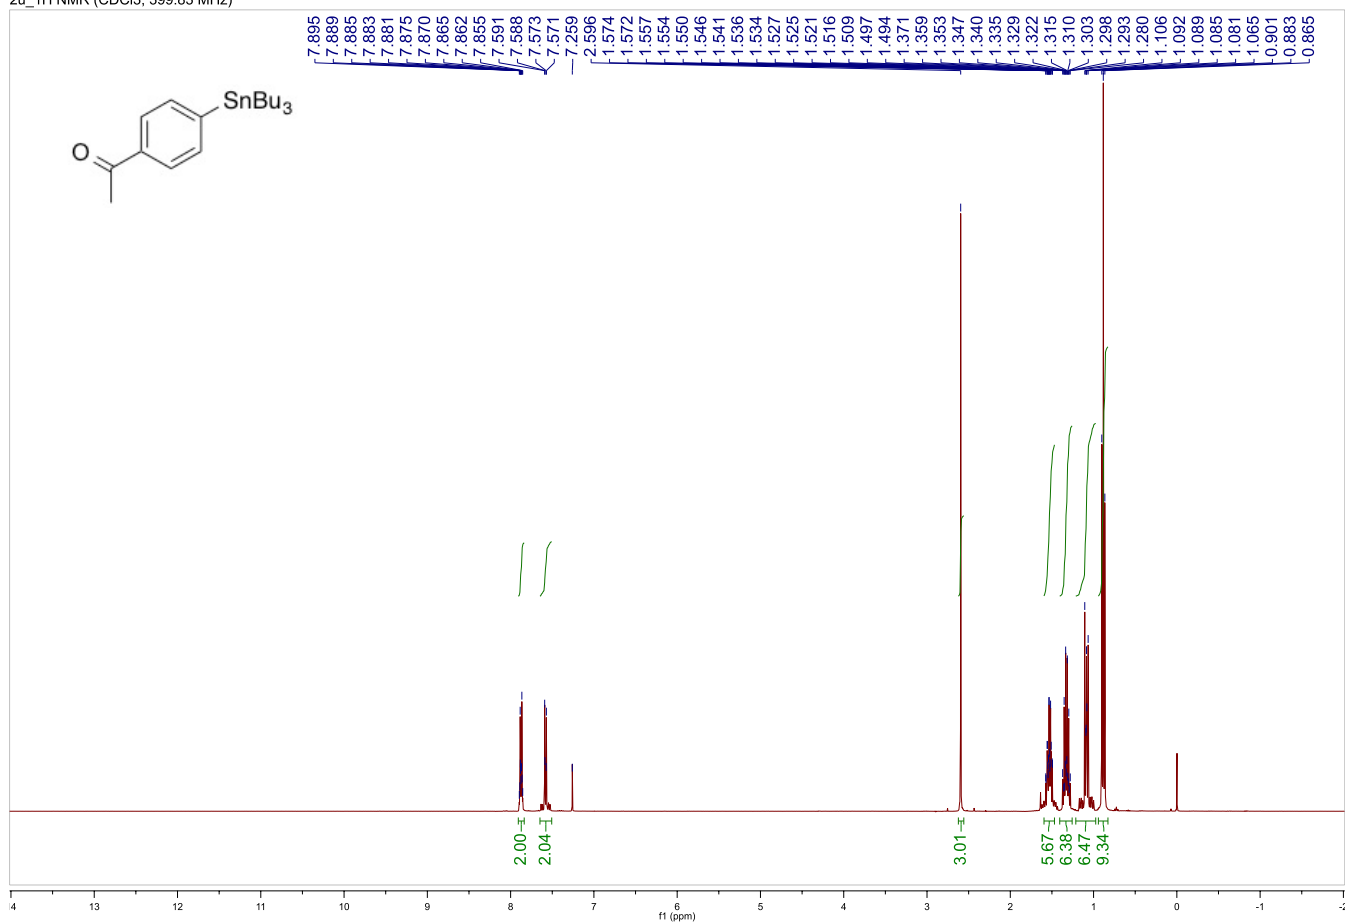

2u\_13C NMR (CDCl3, 100.55 MHz)

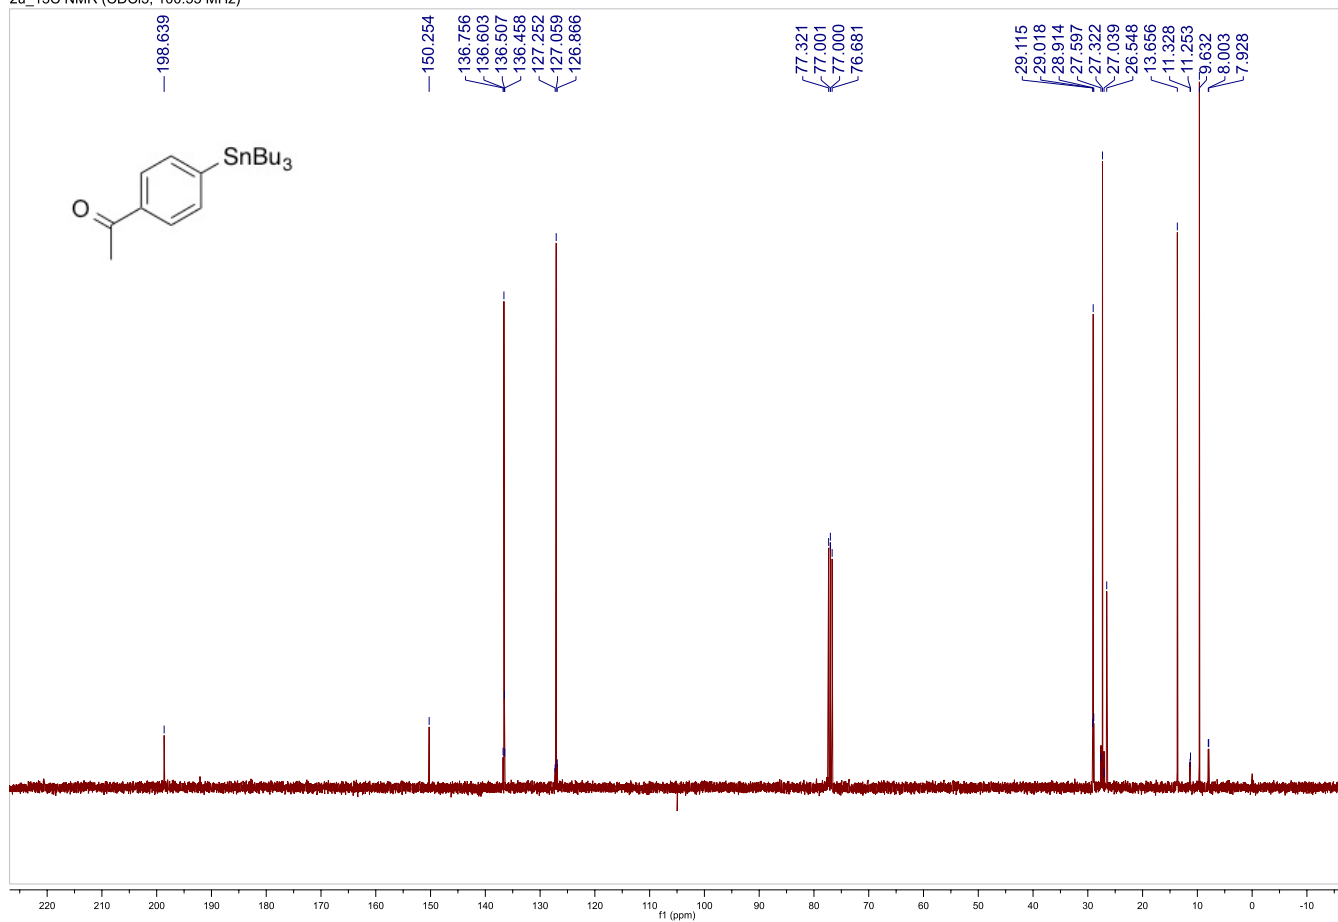

2v\_ 1H NMR (CDCl3, 499.94 MHz)

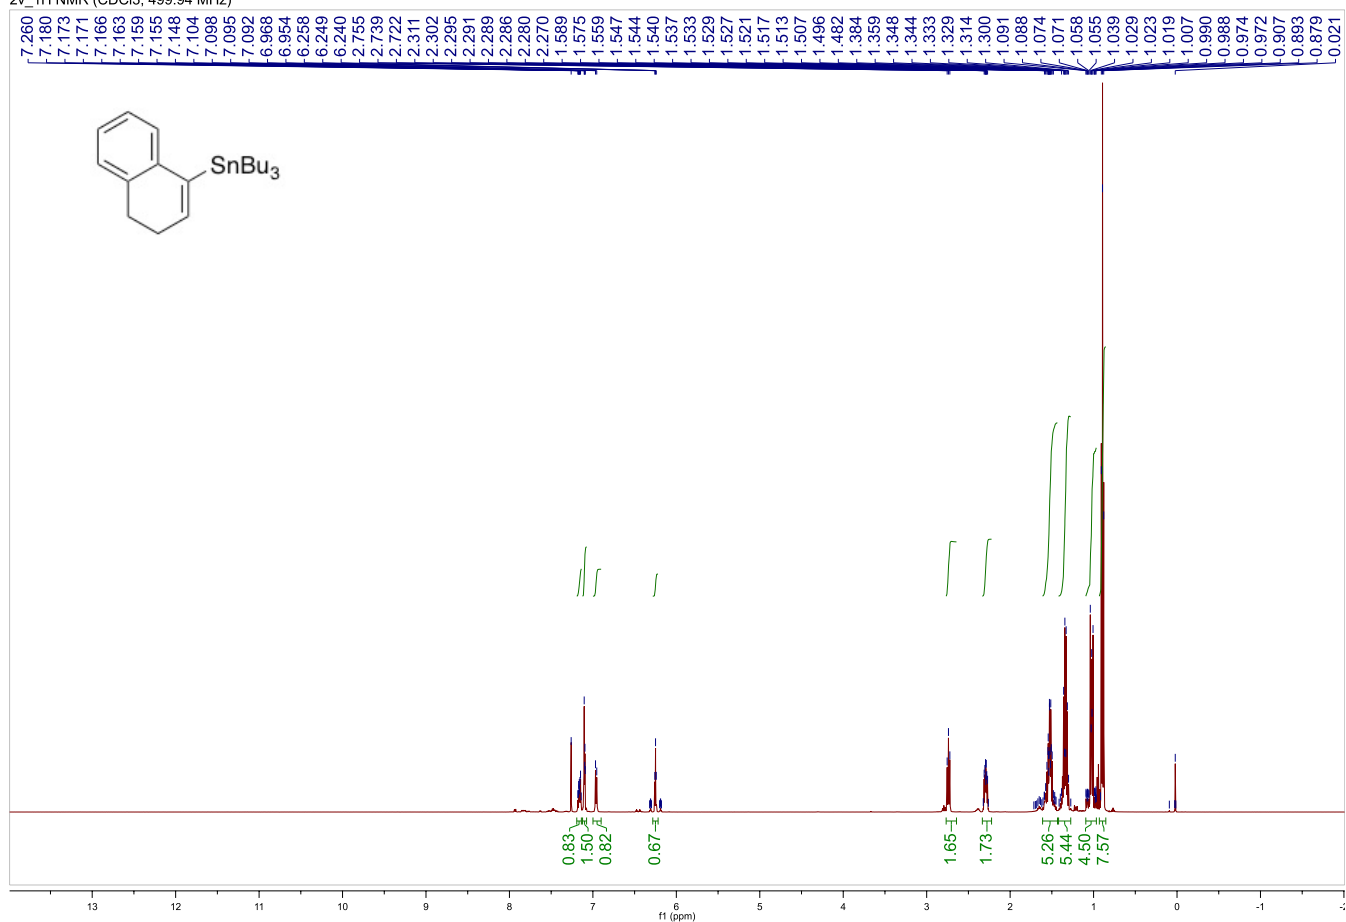

2v\_ 13C NMR (CDCl3, 125.72 MHz)

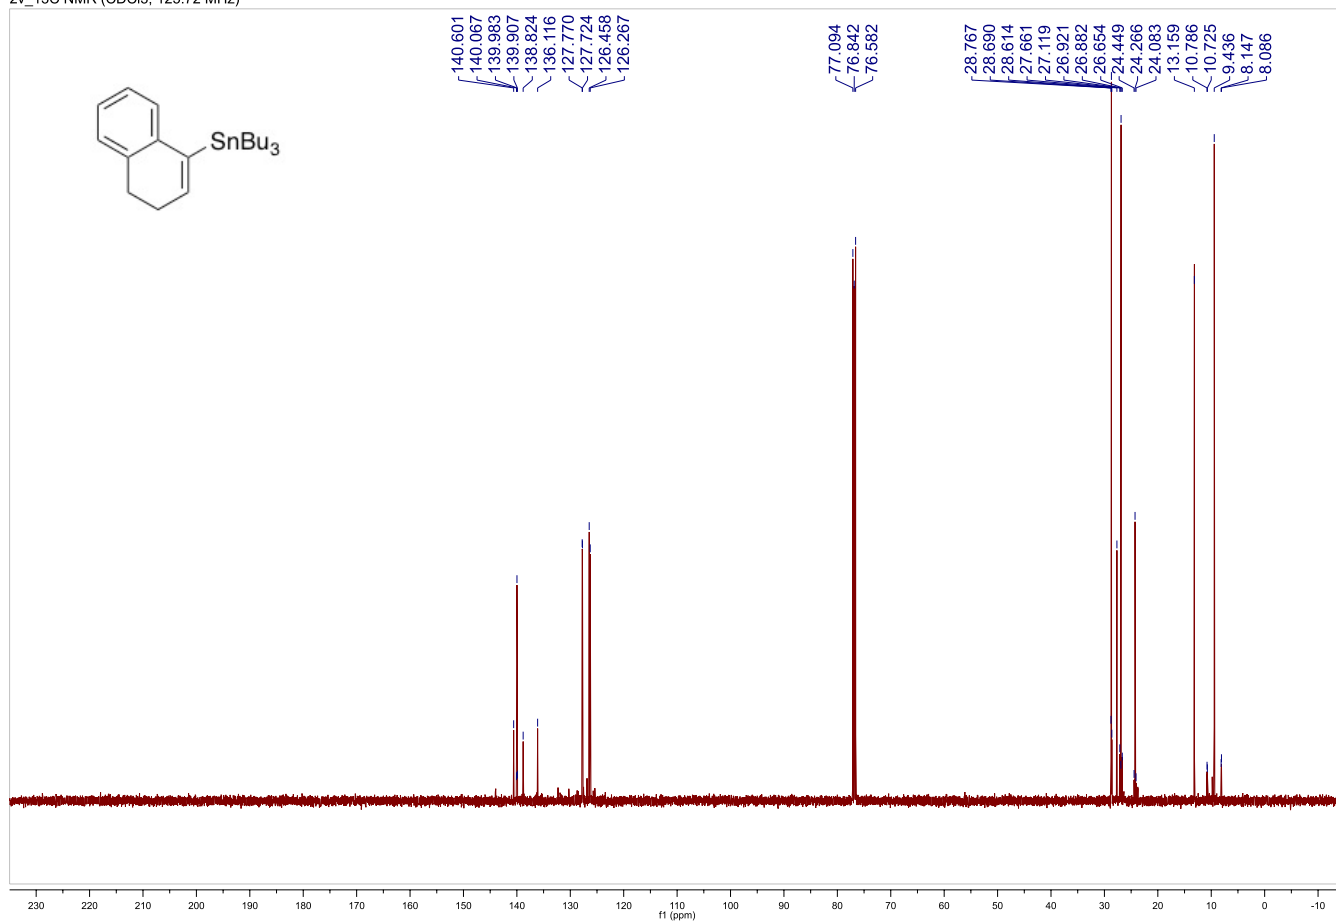



2w\_ 1H NMR (CDCl3, 399.83 MHz)

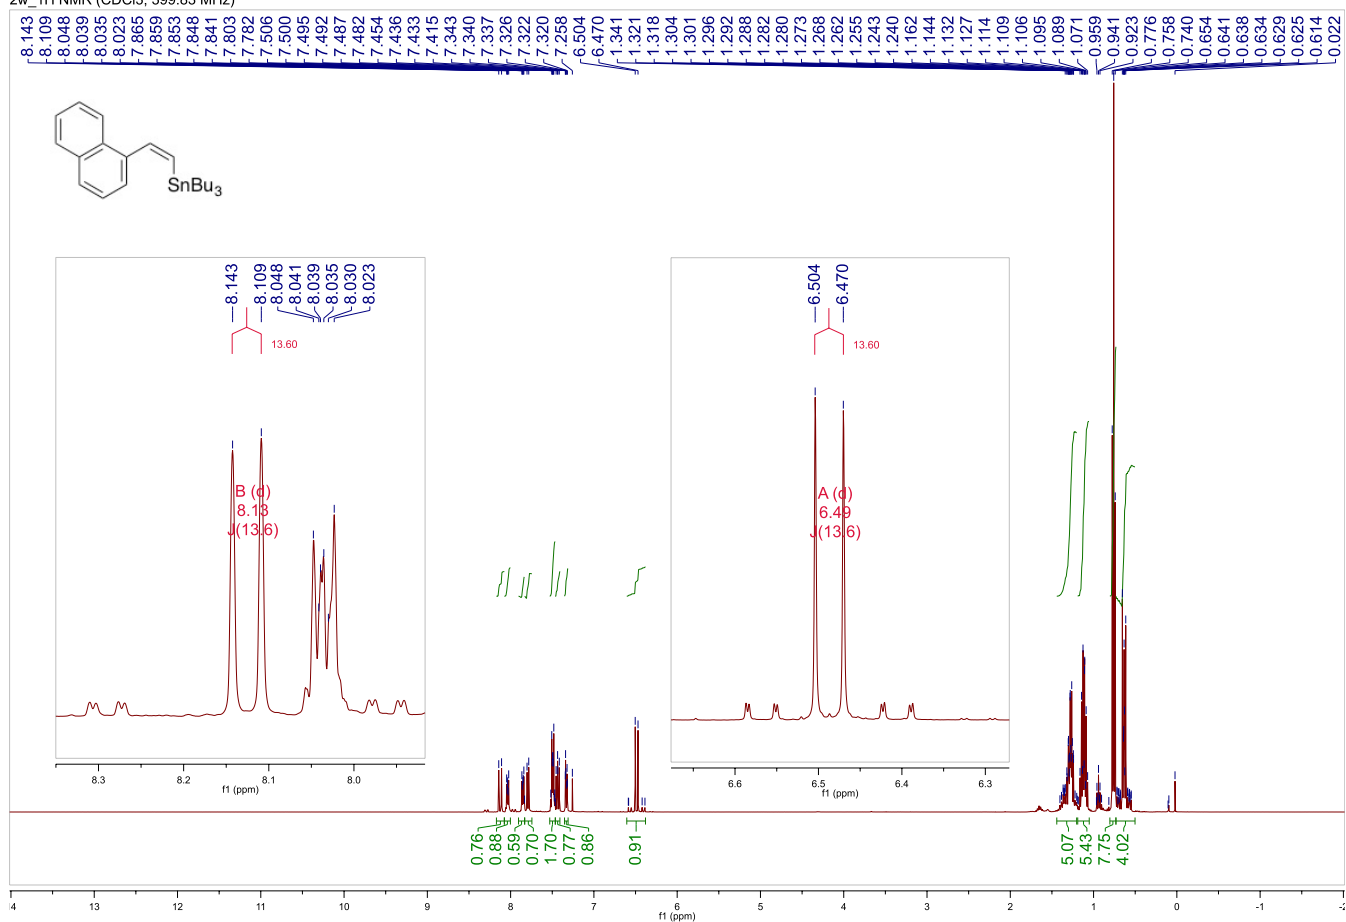

2w\_ 13C NMR (CDCl3, 100.55 MHz)

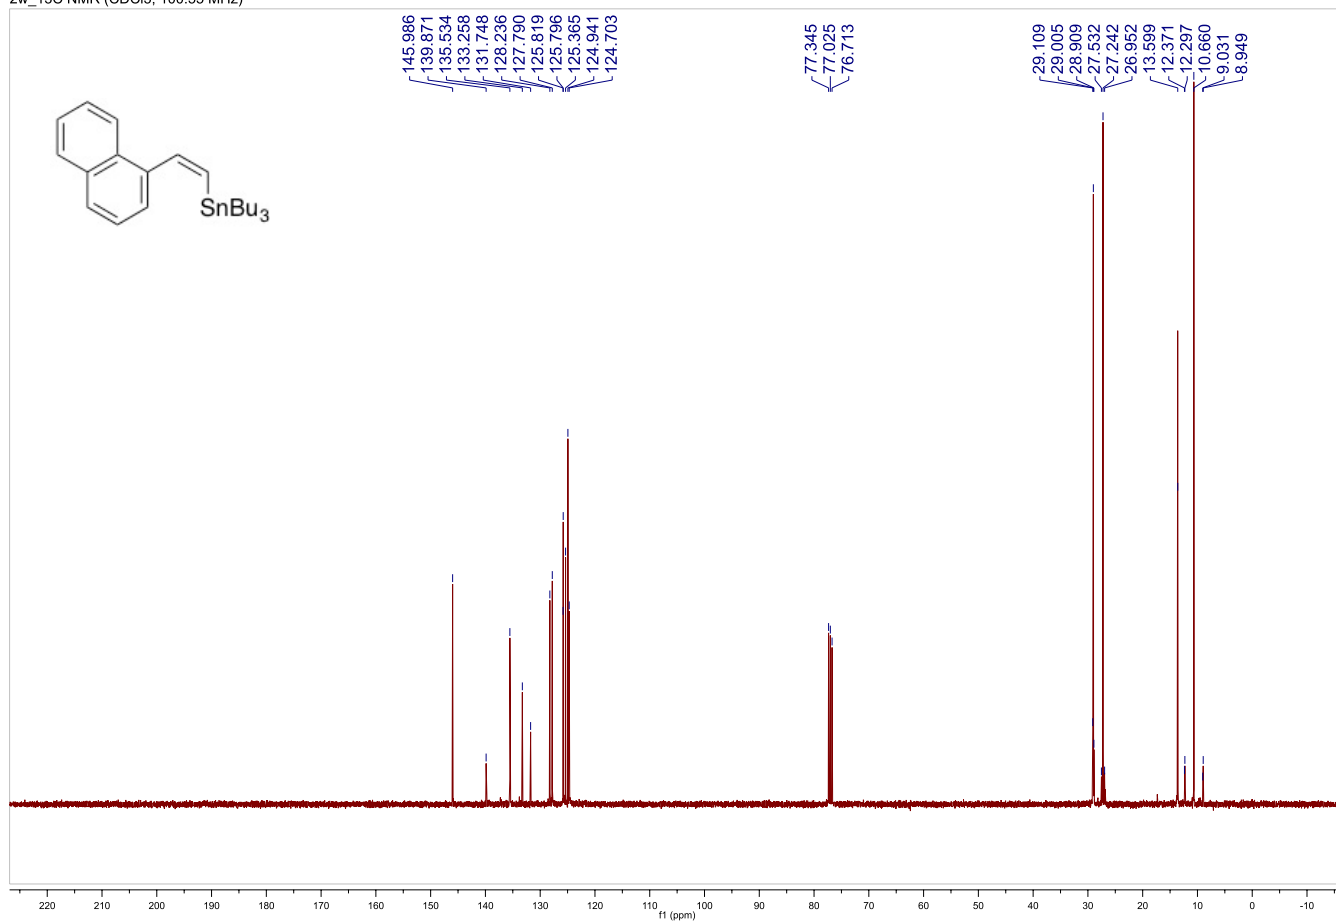

2x\_1H NMR (CDCl3, 499.94 MHz)

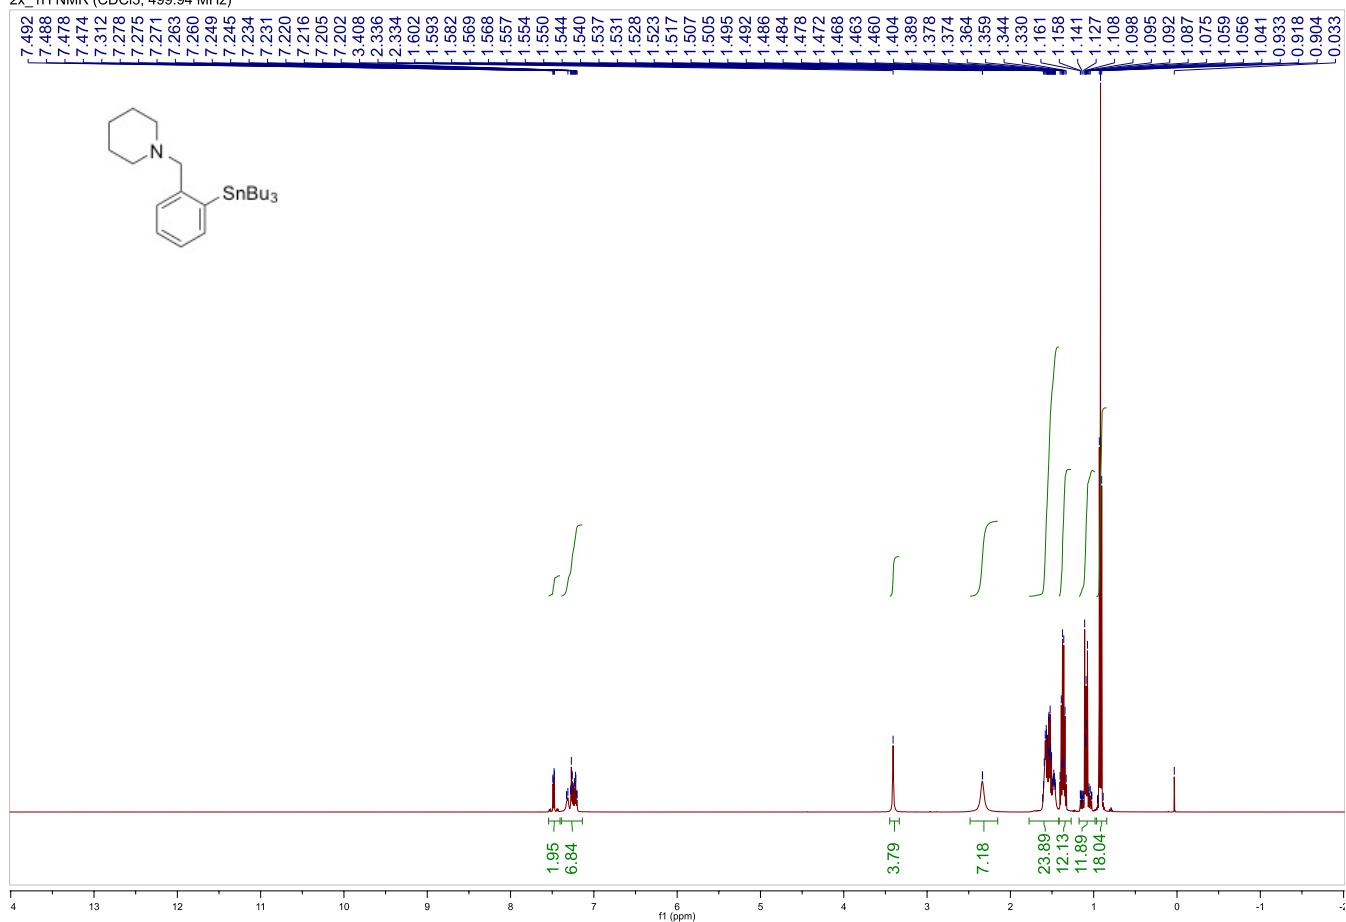

2x\_13C NMR (CDCl3, 125.72 MHz)

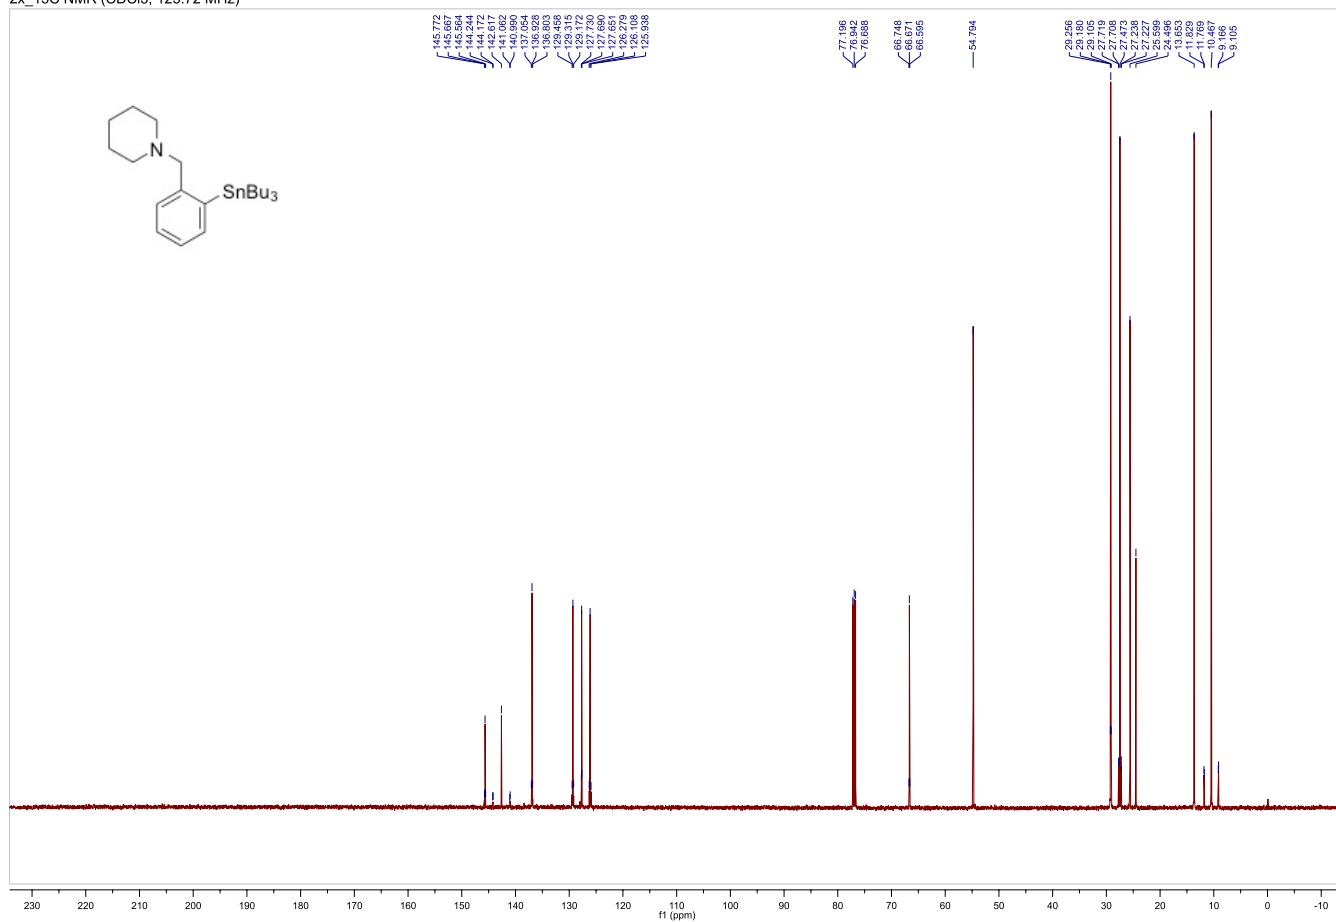

Supplement: c5ob01096a2.pdf [file c5ob01096a2.pdf]
